1 **CRISPR-based bioengineering of the Transferrin Receptor revealed**  
2 **a role for Rab7 in the biosynthetic secretory pathway**

3 Maika S. Deffieu<sup>1, 2,\*</sup>, Ieva Cesonyte<sup>2</sup>, François Delalande<sup>3</sup>, Gaëlle Boncompain<sup>4</sup>, Cristina  
4 Dorobantu<sup>2, §</sup>, Eli Song<sup>5</sup>, Vincent Lucansky<sup>2, §</sup>, Aurélie Hirschler<sup>3</sup>, Sarah Cianferani<sup>3</sup>, Tao Xu<sup>5</sup>,  
5 Franck Perez<sup>4</sup>, Christine Carapito<sup>3</sup>, Raphael Gaudin<sup>1, 2,\*</sup>.

6

7 <sup>1</sup> Institut de Recherche en Infectiologie de Montpellier (IRIM) CNRS, Univ Montpellier, 34293  
8 Montpellier, France.

9 <sup>2</sup> INSERM, Univ Strasbourg, 67000 Strasbourg, France

10 <sup>3</sup> Laboratoire de Spectrométrie de Masse Bio-Organique, IPHC, UMR 7178, CNRS-  
11 Université de Strasbourg, ECPM, 67087 Strasbourg, France

12 <sup>4</sup> Institut Curie, CNRS UMR144, Paris 75005 Paris

13 <sup>5</sup> Institute of Biophysics, Chinese Academy of Science, 100101 Beijing, China

14

15 § Present addresses:

16 CD: Viroclinics Biosciences B.V., Rotterdam, The Netherlands

17 VL: Comenius University in Bratislava, the Jessenius Faculty of Medicine in Martin (JFMED  
18 CU), Biomedical Center Martin, Mala Hora 4C, 036 01 Martin, Slovakia

19

20 \* Co-corresponding authors:

21 Raphael Gaudin ([raphael.gaudin@irim.cnrs.fr](mailto:raphael.gaudin@irim.cnrs.fr)) and Maika Deffieu  
22 ([maika.deffieu@irim.cnrs.fr](mailto:maika.deffieu@irim.cnrs.fr))

23 1919 route de Mende, 34293 Montpellier, France.

24 Lead contact: Raphael Gaudin ([raphael.gaudin@irim.cnrs.fr](mailto:raphael.gaudin@irim.cnrs.fr))

25

26 Running title: The eRUSH system uncovered Rab7 vesicles as secretory carriers

27

28 Keywords: membrane dynamics; Cas9; TGN exit; vesicular transport; Rab GTPase;  
29 intracellular trafficking.

30 **Abstract**

31 The regulated secretory trafficking of neosynthesized transmembrane receptors is  
32 particularly challenging to investigate as it is under-represented at steady state compared to  
33 the abundance of the other trafficking routes. Here, we combined the retention using  
34 selective hook (RUSH) system to a CRISPR/Cas9 gene editing approach (eRUSH) to  
35 identify molecular players involved in the trafficking of neosynthesized Transferrin Receptor  
36 (TfR) *en route* to the plasma membrane (PM). TfR-eRUSH monoclonal cells expressing  
37 endogenous, ER-retainable and fluorescent TfR were engineered and characterized.  
38 Spatiotemporal quantitative proteomics of TfR-eRUSH cells allowed the identification of  
39 molecular partners associated with TfR-containing membranes and provided a  
40 comprehensive list of potential regulators, co-trafficking cargos, and enriched pathways.  
41 Furthermore, we chose to focus our attention on the Rab GTPase family members for their  
42 function as vesicle trafficking regulators and performed a Rab-targeted siRNA screen that we  
43 correlated to our proteomics data. Unexpectedly, we identified Rab7-harboring vesicles as  
44 an intermediate compartment of the Golgi-to-PM transport of the neosynthetic TfR. These  
45 vesicles did not exhibit degradative properties and were not associated to Rab6A-harboring  
46 vesicles, also involved in Golgi-to-PM transport. However, Rab6A-TfR vesicles delivered TfR  
47 directly to the PM, while in contrast, Rab7A was transiently associated to neosynthetic TfR-  
48 containing post-Golgi vesicles but dissociated before PM vesicle fusion. Together, our study  
49 proposes the eRUSH as a powerful tool to further study the secretory pathway and reveals  
50 an unforeseen role for Rab7 in the neosynthetic transport of the TfR, highlighting the diversity  
51 of the secretory vesicles' nature for a given cargo.

52

53

Deffieu et al.

The eRUSH system uncovered Rab7 vesicles as secretory carriers

## 54 **Introduction**

55 Cells sense environmental changes and adapt accordingly by exposing a variety of  
56 transmembrane receptors at their cell surface. Post-translational modifications and  
57 final localization of these transmembrane receptors at the plasma membrane (PM)  
58 are first occurring through the membrane dynamics along the secretory pathway. The  
59 secretory pathway is a constitutive or regulated process (1) carrying neosynthesized  
60 proteins from the endoplasmic reticulum (ER) to the PM. Characterizing the  
61 molecular mechanisms involved in this cellular process may be useful for the  
62 development of inhibitors targeting general or cargo-specific secretion (2).

63 Transmembrane receptors are synthesized and folded in the ER. After synthesis,  
64 coatamer protein complex II (COP-II) vesicles export the incorporated receptors to  
65 the *cis*-Golgi cisternae (3). The transit of these cargoes through the Golgi stacks is  
66 still debated (4,5), although it is well established that proteins undergo successive  
67 post-translational modifications during their trafficking from the *cis*-Golgi to the TGN.  
68 Upon protein arrival at the TGN, cargoes are specifically packaged and sorted to be  
69 delivered to different organelles such as endosomes, lysosomes or the PM. Sorting  
70 signals identified at the cytosolic regions of transmembrane receptors lead to the  
71 specific recruitment of adaptor proteins (APs) or small Rab-GTPases, needed for the  
72 incorporation of the cargo inside vesicle carriers. After budding off the TGN  
73 membranes, proteins are delivered to their final destination through vesicular  
74 transport. It was long being thought that transmembrane receptors use a direct route  
75 from the TGN to the PM. Observations of differential trafficking routes suggested  
76 otherwise. Indeed, several studies noticed the presence of cargoes inside endocytic  
77 compartments before their delivery to the PM (6–8). The nature and fate of these  
78 intermediate compartments in protein secretion is still unclear.

Deffieu et al.

The eRUSH system uncovered Rab7 vesicles as secretory carriers

79 To mechanistically understand temporally and spatially the secretory pathway, a few  
80 systems were developed. One of the earliest methods developed to study protein  
81 secretion was the thermo-sensitive vesicular stomatitis virus glycoprotein (ts045VSV-  
82 G) (9). It involves incubation of cells at a restrictive temperature to block ts045VSV-G  
83 transport at the ER followed by a shift at a lower permissive temperature to induce  
84 the release of the protein to its normal trafficking pathway (10). This method provided  
85 valuable analytical information on the dynamics and kinetics of transport of  
86 ts045VSV-G from the TGN to the PM.

87 To avoid non-physiological conditions of temperature and monitor different cargo  
88 proteins, the RUSH (retention using selective hooks) system was elaborated (11). It  
89 allows the retention of a protein of interest in the ER, then its on-demand release  
90 following the addition of biotin in the cell media. This method proved to be very  
91 powerful (2,12–15), but it requires the transient overexpression of the protein of  
92 interest which is a limitation in case of regulated secretion. In addition, the co-  
93 existence of the overexpressed tagged and the non-tagged endogenous cargos  
94 could confer some limitations for quantitative temporal detection of a receptor at the  
95 PM.

96 The vesicular carriers involved in the secretory pathway are difficult to study because  
97 of their low abundance at steady state compared to endocytic/recycling vesicles. This  
98 is particularly true for the Transferrin Receptor 1 (TfR), which is widely used for  
99 recycling studies (for review see (16)). TfR is a ubiquitous transmembrane  
100 glycoprotein that mediates iron uptake from circulating transferrin (Tf) at the PM. After  
101 formation of the TfR-Tf complex at the cell surface, the receptor is internalized by  
102 clathrin-mediated endocytosis and delivered to endosomes. Inside these organelles,  
103 TfR dissociates from its ligand and is recycled back to the cell surface. Studies

Deffieu et al.

The eRUSH system uncovered Rab7 vesicles as secretory carriers

104 indicated that an alteration of the expression level of TfR could trigger carcinoma  
105 progression (17,18). Indeed, cancer cells expressed a high amount of TfR at their cell  
106 surface which makes it a significant anti-cancer target (19,20).

107 Neosynthesized TfR arriving at the PM represents a minor fraction of the total TfR  
108 pool expressed at the cell surface at steady state, and thus the pathway of newly  
109 synthesized TfR is particularly difficult to investigate. In this study, we developed an  
110 approach that combines the RUSH system with CRISPR/Cas9 gene editing that we  
111 called “edited-RUSH” or “eRUSH”. We employed eRUSH to investigate the molecular  
112 mechanisms involved in the vesicular transport of neosynthesized TfR to the PM. The  
113 TfR-eRUSH allowed the spatiotemporal monitoring of the trafficking of the  
114 neosynthesized endogenous TfR as well as the identification of the molecular  
115 partners involved in this process. In particular, we highlighted that Rab7A, a small  
116 Rab GTPase usually described as an endolysosomal marker, is required for efficient  
117 arrival of neosynthesized TfR at the PM and was recruited to a subset of post-TGN  
118 TfR-containing vesicles, suggesting that Rab7 may play a role in the anterograde  
119 trafficking pathway of secretory vesicles.

## 120 **Results**

### 121 **Generation and characterization of the TfR-eRUSH system.**

122 The CRISPR/Cas9 strategy that we previously described (21) was used to engineer  
123 the breast cancer-derived SUM159 cells to express endogenous TfR fused to the  
124 streptavidin-binding peptide (SBP) and EGFP. Lentiviral transduction of a chimera  
125 streptavidin-KDEL protein was performed to establish a stable cell line that retains  
126 SBP-containing proteins in the ER (see (11) for original description of the RUSH  
127 system) and the resulting TfR-eRUSH cells were subsequently characterized.

Deffieu et al.

The eRUSH system uncovered Rab7 vesicles as secretory carriers

128 As depicted in Figure 1A, SBP fused to EGFP was introduced in the genomic  
129 sequence of TfR before its stop codon sequence. At the genomic DNA level, both  
130 alleles were carrying an extra piece of DNA corresponding to the SBP-EGFP tag  
131 (Figure 1B). At the protein level, almost no endogenous TfR was detected (at  $\approx$  84  
132 kDa), while an upper band at  $\approx$  117 kDa appeared, corresponding to the expected  
133 size of TfR-SBP-EGFP protein (Figure S1A). Of note, the molecular weights were  
134 difficult to precisely assess as ladders from different brands were providing dissimilar  
135 sizes for a given band. Using an anti-EGFP antibody, we could confirm that TfR-SBP-  
136 EGFP was indeed running at an apparent size of 117 kDa (Figure S1B). Depending  
137 of the ladder used along our study, the TfR-eRUSH would appear as a band of either  
138  $\approx$  98 kDa or 117 kDa, although both would correspond to the TfR-eRUSH.

139 From the immunoblot, it seemed that less TfR-SBP-EGFP proteins were expressed  
140 in the edited cells than the endogenous TfR from WT cells. However, quantification of  
141 the amount of proteins from bands of different sizes is not reliable due to different  
142 protein transfer efficiency. Thus, an anti-TfR antibody staining on WT and TfR-  
143 eRUSH cells was performed and the mean fluorescence intensity of the TfR staining  
144 was measured by flow cytometry. We found that TfR-eRUSH cells express less  
145 endogenous TfR than their parental cell line (Figure 1C).

146 Next, we carried out 3D confocal live cell imaging on TfR-eRUSH cells to determine  
147 whether TfR-eRUSH could be efficiently retained in the ER. We observed that in  
148 absence of biotin (0 min), TfR-eRUSH was retained in the ER (Figure 1D, upper  
149 panels and corresponding Movie S1). Two to six minutes after biotin addition,  
150 vesicles were released from the ER to reach the Golgi apparatus. This trend was  
151 successfully quantified by measuring the Pearson's correlation coefficient between  
152 TfR and either Calnexin (ER) marker), GM130 (cis-Golgi) or TGN46 (trans-Golgi) at 0

Deffieu et al.

The eRUSH system uncovered Rab7 vesicles as secretory carriers

153 min, 5 min and 15 min post-biotin addition (Figure S1C-D). While the ER released  
154 most of its vesicles, a short lag was observed at  $\approx$  12 minutes before observing  
155 numerous vesicles exiting from the Golgi apparatus. At 20 min, most of TfR-eRUSH  
156 was localized at the Golgi and vesicles were massively released from this location. In  
157 parallel, PM gained higher TfR-eRUSH fluorescence intensity (Figure 1D, blue  
158 arrowheads and Movie S1), indicating that the first detectable amounts of TfR-  
159 eRUSH proteins arrived at the PM at 20 min post-biotin addition.

160 To quantitatively measure the kinetics of TfR-eRUSH arrival at the PM, a flow  
161 cytometry assay was optimized (Figure 1E). At different times post-biotin addition,  
162 cells were incubated at 4°C to block membrane trafficking and the PM-exposed TfR  
163 was labeled using recombinant transferrin coupled to an Alexa Fluor 647 (Tf-A647)  
164 (Figure 1E). We noticed that a small fraction of TfR-eRUSH was already found at the  
165 PM even in absence of biotin (0 min), suggesting that either some aspecific Tf  
166 binding occurred or that a small amount of TfR-eRUSH was not retained by the hook.  
167 While the fluorescence signal of Tf-A647 was lowly increasing over the 20 first min  
168 after biotin addition, a three-fold increase was observed at 30 min post-biotin  
169 addition. This kinetics were confirmed by microscopy (Figure 1F) and are in  
170 agreement with our live cell imaging (Figure 1D) in which the first TfR proteins could  
171 be readily detected at the PM at  $\approx$  23 min post-biotin addition, then rising over time.

172 In conclusion, our TfR-eRUSH system represents a valid approach to study the  
173 molecular mechanism of the TfR secretory pathway in an endogenous synchronized  
174 model.

175 **Molecular signature of the TfR-associated membranes using TfR-eRUSH cells**

Deffieu et al.

The eRUSH system uncovered Rab7 vesicles as secretory carriers

176 To identify the molecular partners enriched in the TfR-containing membranes over  
177 time, anti-TfR affinity-purification mass spectrometry (AP-LC-MS/MS) experiments  
178 using TfR-eRUSH lysates obtained from mechanical cell disruption was performed at  
179 different time points post-biotin addition. AP-LC-MS/MS was run in quadruplicate and  
180 > 2000 proteins were identified in each sample. Differential temporal analysis  
181 identified 557 proteins enriched at T15 compared to T0 (T0-T15), while no significant  
182 protein enrichment could be measured at T30 compared to T15 (T15-T30). This  
183 absence of protein enrichment between T15 and T30 could be attributed to the lack  
184 of temporal resolution and/or the fact that multiple trafficking pathways are  
185 overlapping at these times, blurring the final picture. Parallel analyses using STRING  
186 (22) (Figure 2A), and the molecular signature database MSigDB (23) (Figure 2B and  
187 Table S1) were run on the enriched protein lists from the T0-15 differential analysis.  
188 These methods were employed to highlight protein clusters and biological processes  
189 associated to neosynthesized TfR trafficking.

190 The pathways “intracellular transport”, “Cellular macromolecular localization”,  
191 “intracellular protein transport” and “secretion” were highly enriched compared to T0  
192 as shown by the low false-discovery rates (FDR) values, an expected result due to  
193 the nature of the assay (Figure 2B). Moreover, the pathways associated to  
194 “exocytosis” (FDR =  $4.75 \cdot 10^{-23}$ ) and “Golgi vesicle transport” (FDR =  $2 \cdot 10^{-15}$ ) were  
195 also significantly enriched to a lower extend. As a proof of concept, we confirmed that  
196 TMED10, a protein identified as enriched in our proteomics analyses was indeed  
197 recruited to TfR secretory vesicles (Table S1, Figure S2A). TMED10 is involved in the  
198 COPII vesicle-mediated anterograde transport (24) and incorporated in a subset of  
199 extracellular vesicles (25), and thus we could confirm the relevance of our differential  
200 proteomics approach.



Deffieu et al.

The eRUSH system uncovered Rab7 vesicles as secretory carriers

201 The pathways “oxidation reduction process”, “cellular respiration” and “mitochondrion  
202 organization” also scored significant low FDR values. ER and mitochondrial  
203 membranes are well-known to tightly interact (26) and recent work proposed that  
204 endosome-mitochondria interactions are important for the release of iron (27). Here,  
205 the mitochondria-associated proteins identified may be the result of association of  
206 distinct membranes during the immunoprecipitation rather than actual presence of  
207 TfR within mitochondria. In fact, proximity was observed between TfR-eRUSH and  
208 mitotracker-labeled mitochondria (Figure S2B). By live cell imaging, we visualized  
209 some rare events of mitochondria “associated” with vesicles containing TfR-eRUSH  
210 that seemed to bud off the ER, but the resolution achieved with our spinning disk  
211 confocal microscope does not allow us to draw significant conclusion (Figure S2C  
212 and Movie S2).

213 Proteins regulating intracellular trafficking may be differentially recruited on vesicular  
214 membranes to activate a specific trafficking route. Therefore, we chose to further  
215 investigate the role of Rab proteins as they are well-known small GTPase regulators  
216 of intracellular membrane traffic. In our AP-LC-MS/MS dataset, we detected a total of  
217 20 Rab proteins (Table S2). No Rab proteins were enriched in TfR-containing  
218 membranes at T15-T30, but 10 Rab proteins were significantly enriched at T0-T15  
219 with a fold change above 1.5 times (Figure 2C). Rab1A, Rab1B and Rab18 were  
220 significantly enriched at T15 compared to T0, an expected result as these Rabs  
221 regulates vesicle trafficking between the ER and the cis-Golgi (28,29), Rab18 being  
222 also found on a subset of extracellular vesicles (25). Rab10, Rab14 and Rab6A were  
223 also enriched at T15 compared to T0, although Rab6 did not reach significance  
224 (Table S2). These Rabs have previously been involved in post-Golgi trafficking  
225 (13,30,31), further indicating that our approach is relevant to identify molecular

Deffieu et al.

The eRUSH system uncovered Rab7 vesicles as secretory carriers

226 partners involved in the secretory pathway. The Rab12 and Rab34 proteins were also  
227 identified, but their function has not been extensively studied. Yet they both may play  
228 a role in protein degradation (32,33). Finally, Rab7A, a protein usually recruited at the  
229 limiting membrane of late endosomes that can serve as degradation signal (34), was  
230 significantly enriched at T15 compared to T0. Rab7A showed one of the highest fold  
231 enrichment score and the greatest number of unique peptides identified by LC-  
232 MS/MS (Figure 2C and Table S2), an intriguing result that we aimed to explore  
233 thereafter.

234 To further investigate the relevance of the Rabs identified in our proteomics analyses,  
235 the distribution of Rab5, Rab6, Rab7, Ruby3-Rab10 and Rab18 was imaged in TfR-  
236 eRUSH cells treated for 12 min with biotin (Figure 2D). While no colocalization was  
237 observed between TfR-eRUSH and Rab5 nor Rab18, association with Rab6, Rab7,  
238 Rab10 was seen.

### 239 **Rab7 is significantly enriched onto post-Golgi TfR-eRUSH vesicles**

240 To further characterize the recruitment of Rab7A on TfR-containing secretory  
241 vesicles, we performed live cell imaging by spinning disk confocal microscopy on  
242 TfR-eRUSH cells transfected with a Ruby3-Rab7A construct under the control of the  
243 weak promoter L30 (to minimize overexpression). Starting from 7 min post-biotin  
244 addition, we noticed the presence of post-TGN TfR-eRUSH signal associated to  
245 Rab7A positive vesicles (Figure 3A and Movie S3). To better appreciate whether TfR-  
246 eRUSH and Rab7A were found on the same vesicles (as opposed to two distinct  
247 vesicles in close proximity), we artificially swollen these compartments using  
248 Apilimod, a PIKfyve inhibitor (35), and indeed, we could identify that TfR-eRUSH-  
249 positive vesicles were decorated with Rab7A at their limiting membrane (Figure 3B).  
250 These data were reminiscent of a recent work nicely demonstrating that post-Golgi

Deffieu et al.

The eRUSH system uncovered Rab7 vesicles as secretory carriers

251 vesicles were positive for Rab6 (13) and indeed in our model, TfR-eRUSH was also  
252 trafficking through Rab6 (Figure S3A).

253 Quantification of TfR-eRUSH association with indicated Rabs was then performed  
254 using antibody staining on TfR-eRUSH cells fixed at 15 min post-biotin addition. As  
255 expected, the percentage of non-Golgi TfR-eRUSH signal associated to Rab5 was  
256 very low (9.3% +/- 1.3), while association with Rab6 and Rab7 was relatively high  
257 (31.7% +/- 2.5 and 42.3% +/- 3.3, respectively; Figure 3C-D). Interestingly however,  
258 TfR-eRUSH vesicles would harbor either Rab7A or Rab6, but no post-Golgi TfR-  
259 eRUSH-Rab6-Rab7A triple colocalization was seen (Figure S3B).

260 Together, our proteomics analysis revealed that several Rabs are enriched onto  
261 secretory TfR-containing vesicles and that Rab7A represent an unexpected protein  
262 recruited in the neosynthetic secretory pathway.

### 263 **Neosynthesized TfR associates with non-degradative Rab7 vesicles**

264 Rab7 is known to direct late endosomal compartments toward degradative Lamp1-  
265 positive compartments (36). By immunostaining, we observed that a subset of TfR-  
266 eRUSH was Rab7-positive and Lamp1-negative (Figure 4A, yellow arrow), but we  
267 could also see triple colocalization of TfR-eRUSH, Rab7, and Lamp1 (Figure 4A,  
268 white arrowheads). However, mapping the association with Lamp1 is not sufficient to  
269 define lysosomal compartments since a recent study demonstrated that TfR is co-  
270 sorted with Lamp1 into post-TGN secretory vesicles *en route* to the PM (37).  
271 Moreover, Lamp1 was also identified in our proteomics analysis (Table S1).

272 Therefore, to better address whether the TfR-Rab7 vesicles correspond to  
273 degradative compartments, pH acidity and proteolytic activity was measured (Figure  
274 4B-C). TfR-eRUSH cells were transfected with Ruby3-Rab7A and were visualized by

Deffieu et al.

The eRUSH system uncovered Rab7 vesicles as secretory carriers

275 live imaging at 10 min post-biotin addition. LysoTracker was used as a readout for  
276 relative pH acidity (a brighter signal corresponding to a lower pH). Our data shows  
277 that TfR-eRUSH vesicles harboring Rab7A had little-to-no LysoTracker signal (Figure  
278 4B, white arrow), indicating that these vesicles do not exhibit features of classical  
279 proteolytic compartments. To assess for actual degradative properties of these  
280 vesicles, we pre-incubated the cells with DQ-BSA, a bovine serum albumin (BSA)  
281 protein that contains self-quenched fluorescent dyes that fluoresce only when the  
282 BSA is cleaved, and stained the cells with an anti-Rab7 antibody (Figure 4C).  
283 Quantification of the percentage of TfR-eRUSH colocalizing with Rab7 or DQ-BSA  
284 demonstrated that the TfR were mainly found in Rab7 vesicles devoid of degraded  
285 DQ-BSA (Figure 4D). Finally, because the TfR was engineered to incorporate SBP  
286 and EGFP, we checked whether a significant subset of protein was sent for  
287 degradation. However, cells treated with Bafilomycin A1 (to prevent protein  
288 degradation) did not induce an accumulation of TfR-eRUSH, while it induced LC3-II  
289 accumulation as expected (Figure 4E). To make sure that the absence of visible  
290 degradation was not due to neosynthesized TfR-eRUSH replenishment, cells were  
291 co-treated with Bafilomycin A1 and cycloheximide, a translation inhibitor. In this  
292 context, we could not observe any accumulation of TfR (Figure 4E) and we were not  
293 able to detect degradation products using either anti-TfR or anti-EGFP antibodies  
294 (Figure S4), suggesting that TfR-eRUSH is not significantly sent for degradation. Of  
295 note, this experiment also indicates that the induction of the eRUSH by the addition  
296 of biotin is not accompanied by the induction of autophagy as LC3-II is not  
297 upregulated (Figure 4E). To further confirm this, LC3 staining was performed and we  
298 could not observe any LC3 staining colocalizing with Rab7-positive TfR-eRUSH  
299 vesicles (Figure 4F), indicating that they do not correspond to autophagosomes.

Deffieu et al.

The eRUSH system uncovered Rab7 vesicles as secretory carriers

300 **Rab7A-vesicles are intermediate compartments mediating the transport of a**  
301 **subset of neo-synthesized TfR-eRUSH to the PM.**

302 To correlate the enrichment over time of Rab proteins to a biological function, we  
303 next carried out a siRNA-based screen targeting 12 members of the Rab protein  
304 family. Silencing of 12 Rabs and a non-relevant target was performed using a pool of  
305 4 siRNA per target in two independent experiments (Figure S5A). The amount of TfR-  
306 eRUSH at the PM was measured by flow cytometry as in Figure 1E, and fold  
307 enrichment of T15 over T0 (Figure 5A) was determined. As Rabs may affect other  
308 cellular processes, the amount of TfR-eRUSH at steady-state was measured by flow  
309 cytometry (Figure S5).

310 At T0-T15, silencing of Rab27A or Rab6A showed significant decrease of PM-  
311 associated TfR (Figure 5A) compared to the non-relevant siRNA control. These  
312 findings were in agreement with the role of these Rabs in protein secretion  
313 (13,38,39), validating our approach. In contrast, Rab10 silencing had no detectable  
314 effect on TfR trafficking to the PM, while we found it enriched in our proteomics  
315 analysis (Figure 2C). Interestingly however, silencing of Rab7A showed a significant  
316 inhibition of TfR-eRUSH arrival at the PM at T0-15. Although Rab7A is known for its  
317 role in endocytic retrograde trafficking to late endosomes and lysosomes (34), this is  
318 consistent with our AP-LC-MS/MS data (Figure 2C), further indicating that Rab7  
319 could participate in the transport of post-TGN TfR vesicles.

320 To directly determine the fate of the Rab-harboring post-Golgi TfR-eRUSH vesicles,  
321 total internal reflection fluorescence (TIRF) microscopy was performed on cells  
322 transfected with Ruby3-Rab7A (Figure 5B and Movie S4) or Ruby3-Rab6A (Figure  
323 5C and Movie S5). After 12 min post-biotin addition, the arrival of TfR-eRUSH was  
324 observed in the evanescent TIRF field. We monitored events during which Rab7-

Deffieu et al.

The eRUSH system uncovered Rab7 vesicles as secretory carriers

325 positive vesicles became positive for TfR-eRUSH for several seconds (Figure 5B;  
326 from 704 s to 736 s) before the two signals segregated again, followed by a TfR-  
327 eRUSH signal burst, indicative of PM fusion (734 s). In sharp contrast, Ruby3-Rab6A  
328 remained associated to TfR-eRUSH vesicles until fusion occurred (Figure 5C; 848-  
329 868 s).

330 These observations indicated that Rab7A vesicles are used as intermediate  
331 compartments in TfR trafficking after its release from the TGN. Unlike Rab6A, Rab7A  
332 vesicles do not accompany neosynthesized TfR all the way to the PM and thus, other  
333 partners are likely involved downstream of the Rab7-TfR vesicle trafficking.

334

## 335 **Discussion**

336 Description of the different pathways mediating transport of neo-synthesized  
337 receptors to the PM has been studied for decades. Being able to specifically observe  
338 the anterograde pathway has always been a challenge as its visualization overlaps  
339 with other trafficking routes, including the overrepresented endocytosis and recycling  
340 pathways. To visualize protein transport under physiological conditions, we combined  
341 the RUSH system to the CRISPR/Cas9 technology. Using TfR as a model, we  
342 generated a stable cell line expressing endogenous levels of the receptor fused to  
343 EGFP and the SBP tag required for the RUSH system. TfR function and trafficking  
344 are well described but the partners involved in neosynthesized TfR trafficking to the  
345 PM are not well characterized. The eRUSH (edited-RUSH) approach was coupled to  
346 quantitative proteomics experiments and cytometry-based screening to identify the  
347 molecular partners involved in the neosynthetic pathway of the TfR. Unexpectedly,

Deffieu et al.

The eRUSH system uncovered Rab7 vesicles as secretory carriers

348 we observed that a significant subset of TfR transits through Rab7-positive vesicles  
349 during its trafficking to the PM.

350 The trafficking kinetics of neosynthesized TfR-eRUSH was similar to the  
351 overexpressed TfR in the RUSH system which was previously described to reach the  
352 PM  $\approx$  30 min post-biotin addition (37). The advantage of our eRUSH is that no or  
353 minimal amount of “ghost” untagged proteins are expressed in TfR-eRUSH, allowing  
354 quantitative single molecule counting as well as whole TfR functional analysis.  
355 Moreover, the eRUSH also represents a powerful knock-away system, similar to  
356 other methods (40), but without the problem of competition with the wild type version  
357 of the protein co-expressed in the cell. In contrast to classic cDNA transfection,  
358 CRISPR/Cas9-based gene editing of TfR allows the conservation of the regulatory  
359 genomic environment of the gene. This parameter is particularly important for  
360 proteins such as TfR as its transcriptional/translational regulation is a finely regulated  
361 process (41,42).

362 Using AP-LC-MS/MS, we could track the local TfR environment at different times  
363 post-biotin addition and identify proteins co-distributing with TfR-extracted  
364 membranes. Whereas previous siRNA-based screens studying the secretory  
365 pathway allowed the identification of important novel partners (43), our eRUSH-  
366 based proteomics is based on a non-interfering approach, and thus, it provides new  
367 complementary information to previous studies. Pathway analysis revealed relevant  
368 enriched biological processes as well as less expected ones. Indeed, an enriched  
369 proportion of mitochondrial proteins at 15 min post-biotin addition was observed. We  
370 propose that this result is due to ER-mitochondria membrane contacts sites and may  
371 not be relevant to the biosynthetic pathway of TfR.

Deffieu et al.

The eRUSH system uncovered Rab7 vesicles as secretory carriers

372 Some Rabs can act together in the exocytosis process, such as Rab6 and Rab8 (44)  
373 or Rab3 and Rab27 (45). We detected > 35% of TfR-eRUSH-containing vesicles  
374 harboring a Rab6-positive staining (Figure 3D), but our data suggest however that  
375 Rab6 and Rab7 do not intervene at the same stage of the secretory pathway and/or  
376 in the same type of vesicular transport, as shown by the absence of overlap between  
377 the Rab6 and Rab7 staining (Figure S3B). Moreover, by TIRF microscopy (Figure  
378 5B-C), we noticed two different processes of TfR transport using Rab6A or Rab7A,  
379 further indicating that these two Rabs likely correspond to two distinct secretory  
380 routes.

381 Combining results from the AP-MS/MS and siRNA screen, only one Rab was  
382 significantly standing out: Rab7. Rab7 is mostly known to mediate cargo trafficking  
383 between late endosomes and lysosomes (34) and it was unexpected to find it  
384 involved in the neosynthetic pathway. By electron microscopy, a group observed the  
385 presence of neosynthesized TfR inside endosome-like structures (6). Moreover, it  
386 was demonstrated that Rab7 was not involved in recycling of TfR at the PM as  
387 depletion of Rab7A had no effect on TfR re-localization to the PM (34) and thus, it is  
388 unlikely that our observations would be the result of marginal PM-associated TfR  
389 endocytosis at early times post-biotin addition.

390 A legitimate thought is to believe that the post-golgi Rab7-decorated TfR-eRUSH  
391 vesicles correspond to a degradative pathway. However, extensive analyses of these  
392 vesicles clearly show that they stain mostly negative/dim to lysotracker, they are not  
393 proteolytically active (DQ-BSA marker) nor autophagosomes, while autophagy is not  
394 induced by the biotin treatment (Figure 4). Moreover, the full membranes of the  
395 western blot analysis show no degradative product, further demonstrating that TfR-  
396 eRUSH vesicles harboring Rab7 are not degradative and actually, direct evidence



Deffieu et al.

The eRUSH system uncovered Rab7 vesicles as secretory carriers

397 support PM-targeting of these vesicles (Figure 5B). Yet, the function of these vesicles  
398 as compared to the Rab6-positive vesicles, remain to be determined.

399 A recent study by Chen and colleagues indicated that neosynthesized TfR was  
400 sorted out with the Lamp1 protein in vesicles exiting the TGN (37). These vesicles  
401 were devoid of the mannose-6P receptor (M6PR), which was used as a marker for  
402 Golgi-to-endosome route (46). In our hands, we found that M6PR was absent of the  
403 TfR-eRUSH vesicles harboring Rab7 (not shown). They concluded that the TfR<sup>+</sup>  
404 Lamp1<sup>+</sup> vesicles were *bona fide* secretory vesicles *en route* to the PM. In our study, a  
405 subset of vesicles containing TfR-eRUSH and Lamp1 were also decorated by Rab7  
406 at time points corresponding to TGN exit. These vesicles may correlate with the ones  
407 described by Chen *et al.* but their comprehensive composition and function in the  
408 secretory pathway remains to be fully determined.

409 We suggest that Rab7 could act as an intermediate compartment for neosynthesized  
410 TfR transport. Although the role of Rab7 on these secretory vesicles remains to be  
411 determined, one could hypothesize that Rab7 regulates the trafficking of cargos with  
412 specific post-translationally modifications. Alternatively, this pathway could transport  
413 cargos dedicated to specific PM domains. Recently, Rab7 has been mapped not only  
414 to late endosomes and lysosomes but also at the ER, TGN and mitochondrial  
415 membranes, a localization maintained by the retromer complex (47), and thus, it is  
416 likely that Rab7 exerts pleiotropic roles.

417

## 418 **Materials and Method**

### 419 ***Cell culture.***

Deffieu et al.

The eRUSH system uncovered Rab7 vesicles as secretory carriers

420 SUM159 cells were cultured in DMEM/F-12 GlutaMAX (GIBCO), supplemented with 5%  
421 fetal bovine serum (FBS; Dominique Dutscher), 500 µg/ml penicillin-streptomycin (GIBCO), 1  
422 µg/ml hydrocortisone (Sigma-Aldrich), 5 µg/ml insulin (Sigma-Aldrich), and 10 mM HEPES  
423 (GIBCO) (complete medium). Cells were maintained at 37°C and 5% CO<sub>2</sub>.

#### 424 ***Generation of the TfR-eRUSH CRISPR/Cas9 edited cell line***

425 Gene editing of the SUM159 cells to fuse the GGSGGSGGS spacer, the SBP and  
426 EGFP sequences to the C-ter of TfR a CRISPR/Cas9 strategy was used as  
427 previously described (21,48). Briefly, three genetic tools were co-transfected using  
428 the transfection reagent TransfeX (ATCC): 1) a plasmid coding for CRISPR-  
429 associated protein 9 (Cas9), a template plasmid; 2) a linear PCR product used to  
430 transcribe the tracrRNA and guide RNA (gRNA) targeting  
431 ATAGCTTCCATGAGAACAGC (corresponding to a region near the genomic TfR  
432 stop codon) under the control of the human U6 promoter; 3) a donor DNA construct  
433 (serving as template during homologous recombination) corresponding to the spacer,  
434 SBP and EGFP sequences flanked by ≈ 800 bp upstream and 800 bp downstream of  
435 the TfR stop codon. Single cell sorting of EGFP-positive cells was performed and  
436 homo/heterozygotic monoclonal cell lines expressing endogenous TfR-eRUSH were  
437 screened by PCR using the forward primer 5' CTCACACGCTGCCAGCTTTA 3' and  
438 reverse primer 5' TTCAGCAGAGACCAGCCCTT 3'.

439 A clone that was edited on both alleles was further transduced with a lentiviral vector  
440 coding the puromycine resistance gene and for the “hook” consisting of the  
441 streptavidin protein linked to the KDEL motif (11). Upon puromycin selection, the  
442 SUM159 TfR-eRUSH cells were expanded and stocks for the original tube were  
443 maintained in liquid nitrogen.

Deffieu et al.

The eRUSH system uncovered Rab7 vesicles as secretory carriers

#### 444 ***Plasmids***

445 The Ruby3-Rab7A, Flag-Apex-Rab7A, Ruby3-Rab6A and Ruby3-Rab10 cDNA  
446 constructs cloned into pBS vectors under the control of the weak promoter L30, were  
447 generated by the Montpellier Genomics Collections (MGC).

#### 448 ***Antibodies and reagents***

449 For immunofluorescence, primary antibodies used were mouse anti-GM130 (1/1000;  
450 BD bioscience), sheep anti-TGN46 (1/1000, Bio-Rad), rabbit anti-Calnexin (1/1000,  
451 Elabscience), mouse anti-Lamp1 (1/100, BD bioscience), rabbit anti-Rab7 (1/250,  
452 Cell Signaling Technology), rabbit anti-Rab5 (1/1000, Cell Signaling Technology),  
453 rabbit anti-Rab6 (1/1000, Cell Signaling Technology), rabbit anti-Rab18 (1/200,  
454 Sigma-Aldrich), rabbit anti-TMED10 (1/500, Sigma-Aldrich), mouse anti-LC3 (1/1000,  
455 Sigma-Aldrich) and mouse anti-TfR (1/250, Miltenyi Biotec). Secondary antibodies  
456 used were Alexa fluor 568 donkey anti-sheep (1/1000, life technologies), Alexa fluor  
457 568 donkey anti-rabbit (1/1000, Thermo Fisher Scientific), Alexa fluor 647 donkey  
458 anti-mouse (1/1000, Thermo Fisher Scientific). Antibodies used for immunoblotting  
459 were rabbit anti-TfR (1/1000, Aviva Systems Biology), mouse anti-beta actin (abcam),  
460 mouse anti-GFP (1/1000, Sigma-Aldrich) and rabbit anti-LC3 (1/1000, Sigma-  
461 Aldrich). Secondary antibodies used for immunoblotting were Goat anti-mouse IgG  
462 HRP antibody (1/10000, Jackson ImmunoResearch), Goat anti-rabbit IgG HRP  
463 antibody (1/10000, Jackson ImmunoResearch). Probes used for  
464 immunofluorescence were membrane-permeable MitoTracker Orange CM-H<sub>2</sub>TMRos  
465 (Molecular probes) used at 100 nM to label mitochondria, LysoTracker red (Life  
466 Technologies) for acidic compartments used 30 min at 50 nM, DQ-Red BSA (Life  
467 Technologies) used at 10 µg/ml in complete medium, and DAPI (1/1000, Sigma-  
468 Aldrich) used to stain the nucleus. For flow cytometry Transferrin coupled to Alexa

Deffieu et al.

The eRUSH system uncovered Rab7 vesicles as secretory carriers

469 fluor 647 (molecular probes) was used at 10 µg/ml, anti-mouse TfR (5 µg/ml, Miltenyi  
470 Biotec), and IgG mouse used as an isotype control. For deglycosylation,  
471 endoglycosidase H was used (NEB).

#### 472 ***Cytometry-based RUSH assay***

473 To detect PM-localized TfR, 40 000 SUM159 cells were plated in 48 well plates and  
474 incubated in complete medium containing 0,28 µg/ml avidin (Sigma-Aldrich) for 48  
475 hours. To initiate TfR release, cells were incubated in a fresh complete medium  
476 containing 40 µM biotin (Sigma) for the indicated amount of time at 37°C and 5%  
477 CO<sub>2</sub>. Then, cells were placed on ice, the media was replaced with ice-cold PBS and  
478 cells were maintained at 4°C for 15 min. Cells were incubated for 20 min with 10  
479 µg/ml of Tf coupled to an Alexa Fluor 647 (Tf-A647; Molecular probes) diluted in PBS  
480 pH 7.0 at 4°C. Unbound Tf-A647 was washed two times with cold PBS and cells  
481 were detached with 5 mM EDTA. Cells were collected and centrifuged at 400 g for 15  
482 min at 4°C. Cell fixation was carried out with 4% paraformaldehyde (PFA) for 20 min  
483 at room temperature and after three washes, they were resuspended in a flow  
484 cytometry buffer (PBS pH7.0, 0.5% BSA, 0.5 mM EDTA). Samples were run on a  
485 Cytoflex flow cytometer (Beckman Coulter) equipped with 488 and 640 nm lasers and  
486 4 filter set.

#### 487 ***SiRNA screen***

488 A pool of four different siRNAs for each of the 12 selected Rab proteins and a non-  
489 targeting siRNA control was purchased as a custom-made siGenome Smart pool  
490 cherry-pick library (Dharmacon, Horizon Discovery; see details in Table S3). Forty  
491 thousand SUM159 cells were seeded in 48-well plates and on the next day, 3 pmol of  
492 siRNA were transfected using lipofectamine 2000 (ThermoFisher Scientific)

Deffieu et al.

The eRUSH system uncovered Rab7 vesicles as secretory carriers

493 according to the manufacturer's instructions. Cells were further incubated 48 h in  
494 complete medium in presence of 0.28 µg/ml of avidin. The day of the experiment,  
495 cells were incubated at different time points with 40 µM of biotin. The cytometry-  
496 based assay for PM-localized TfR described above was used for sample analysis.

497

#### 498 ***Immunoprecipitation of TfR-eRUSH***

499 For immunoprecipitation of the TfR-eRUSH proteins, SUM159 cells were plated in 20  
500 mm sterile culture-treated petri dishes (Corning) for 48 h in complete medium with  
501 0.28 µg /ml of avidin. Upon TfR-eRUSH release by addition of 40 µM biotin, the cells  
502 were incubated on ice, washed with ice-cold PBS and scraped into 1 ml of ice-cold  
503 isolation buffer (PBS devoid of Ca<sup>2+</sup> and Mg<sup>2+</sup>, 0.1% BSA, 2 mM EDTA, pH7.4). Cells  
504 were lysed at 4°C by mechanical lysis using a 22G needle and the resulting lysate  
505 was centrifuged at 2 000 g for 15 min at 4°C. Supernatants were incubated for 2 h at  
506 4°C with 2 µg of anti-TfR antibody previously coupled to Dynabeads (Thermo Fisher  
507 Scientific). The immunoprecipitated TfR-eRUSH-containing membrane fractions were  
508 washed five times with ice-cold PBS at 4°C before elution.

#### 509 ***Mass spectrometry-based quantitative proteomics***

##### 510 *Sample preparation*

511 The immunoprecipitated samples were resuspended in Laemmli buffer and the  
512 antibody-conjugated magnetic beads were removed. Protein concentration was  
513 determined using the RC-DC protein assay (Bio-Rad) according to the  
514 manufacturer's instructions and a standard curve was established using BSA. For  
515 each sample, 8 µg of protein lysate was concentrated on a stacking gel by  
516 electrophoresis. The gel bands were cut, washed with ammonium hydrogen

Deffieu et al.

The eRUSH system uncovered Rab7 vesicles as secretory carriers

517 carbonate and acetonitrile, reduced and alkylated before trypsin digestion (Promega).  
518 The generated peptides were extracted with 60% acetonitrile in 0.1% formic acid  
519 followed by a second extraction with 100% acetonitrile. Acetonitrile was evaporated  
520 under vacuum and the peptides were resuspended in 16  $\mu$ L of H<sub>2</sub>O and 0.1% formic  
521 acid before nanoLC-MS/MS analysis.

#### 522 *NanoLC-MS/MS analysis*

523 NanoLC-MS/MS analyses were performed on a nanoACQUITY Ultra-Performance  
524 LC-system (Waters, Milford, MA) coupled to a Q-Exactive Plus Orbitrap mass  
525 spectrometer (ThermoFisher Scientific) equipped with a nanoelectrospray ion source.  
526 Samples were loaded into a Symmetry C18 precolumn (0.18 x 20 mm, 5  $\mu$ m particle  
527 size; Waters) over 3 min in 1% solvent B (0.1% FA in acetonitrile) at a flow rate of 5  
528  $\mu$ L/min followed by reverse-phase separation (ACQUITY UPLC BEH130 C18, 200  
529 mm x 75  $\mu$ m id, 1.7  $\mu$ m particle size; Waters) using a binary gradient ranging from  
530 1% and 35% of solvent A (0.1 % FA in H<sub>2</sub>O) and solvent B at a flow rate of 450  
531 nL/min. The mass spectrometer was operated in data-dependent acquisition mode by  
532 automatically switching between full MS and consecutive MS/MS acquisitions.  
533 Survey full scan MS spectra (mass range 300-1800) were acquired in the Orbitrap at  
534 a resolution of 70K at 200 m/z with an automatic gain control (AGC) fixed at  $3 \cdot 10^6$   
535 ions and a maximal injection time set to 50 ms. The ten most intense peptide ions in  
536 each survey scan with a charge state  $\geq 2$  were selected for MS/MS. MS/MS spectra  
537 were acquired at a resolution of 17,5K at 200 m/z, with a fixed first mass at 100 m/z,  
538 AGC was set to  $1 \cdot 10^5$ , and the maximal injection time was set to 100 ms. Peptides  
539 were fragmented in the HCD cell by higher-energy collisional dissociation with a  
540 normalized collision energy set to 27. Peaks selected for fragmentation were  
541 automatically included in a dynamic exclusion list for 60 s. All samples were injected

Deffieu et al.

The eRUSH system uncovered Rab7 vesicles as secretory carriers

542 using a randomized and blocked injection sequence (one biological replicate of each  
543 group plus pool in each block). To minimize carry-over, a solvent blank injection was  
544 performed after each sample. A sample pool comprising equal amounts of all protein  
545 extracts was constituted and regularly injected 4 times during the course of the  
546 experiment, as an additional quality control (QC). Protein identification rates and  
547 coefficients of variation (CV) monitoring of this QC sample revealed very good  
548 stability of the system: 2207 of the 2271 identified proteins, namely 97%, showed a  
549 CV value lower than 20% considering all 4 injections.

#### 550 *Data interpretation*

551 Raw MS data processing was performed using MaxQuant software (v 1.5.8.3 (49)).  
552 Peak lists were searched against a composite database including all *Homo sapiens*  
553 protein sequences extracted from UniprotKB-SwissProt (version April 2019;  
554 taxonomy ID: 9606) using the MSDA software suite (50). MaxQuant parameters were  
555 set as follows: MS tolerance set to 20 ppm for the first search and 5 ppm for the main  
556 search, MS/MS tolerance set to 40 ppm, maximum number of missed cleavages set  
557 to 1, Carbamidomethyl (C) set as fixed modification, Acetyl (Protein N-term) and  
558 Oxidation (M) set as variable modifications. False discovery rates (FDR) were  
559 estimated based on the number of hits after searching a reverse database and was  
560 set to 5% for both peptide spectrum matches (minimum length of seven amino acids)  
561 and proteins. Data normalization and protein quantification was performed using the  
562 LFQ (label free quantification) option implemented in MaxQuant (49) using a “minimal  
563 ratio count” of two. The “Match between runs” option was enabled using a 2 min time  
564 window after retention time alignment. All other MaxQuant parameters were set as  
565 default.

Deffieu et al.

The eRUSH system uncovered Rab7 vesicles as secretory carriers

566 To be validated, proteins must be identified in all four replicates of one condition at  
567 least. The imputation of the missing values and differential data analysis were  
568 performed using the open-source ProStaR software (51). Two runs of imputation  
569 were applied, the “SLSA” mode was applied for the POV (partially observed values)  
570 and the “del quantile” for the MEC (missing in the entire condition). Pairwise  
571 comparisons were performed using a Limma t-test on protein intensities. P-values  
572 calibration was performed using the pounds calibration method and the FDR  
573 threshold was set at 5%. The complete proteomics dataset is available via  
574 ProteomeXchange (52,53) with identifier PXD010576.

### 575 ***Gene ontology analysis***

576 Gene set enrichment analysis (GSEA) was run on the protein lists found to be  
577 significantly enriched at least 1.5 times in T0-T15, T0-T30 and T15-T30 using the  
578 online molecular signature database (MSigDB (23)) v6.2. Significantly enriched gene  
579 ontology (GO) pathways related to relevant “biological process” were extracted with  
580 their false-discovery rate (FDR). The Table S1 summarizes the relevant GO  
581 pathways associated to the T0-T15 time points. No significant enrichment was found  
582 at T0-T30 and T15-T30.

### 583 ***Fluorescence microscopy***

584 50 000 cells were plated on 24 well plates containing 12 mm cover glasses (Electron  
585 Microscopy Sciences) and incubated 48 h in complete medium containing 1 µg /ml of  
586 avidin. For the different eRUSH assays, cells were incubated at 5 min, 7 min, 12 min,  
587 15 min and 30 min in complete medium containing 40 µM of biotin. Cells were fixed  
588 with 4% PFA for 20 min at room temperature and were permeabilized for 15 min with  
589 PBS containing 0.1% TritonX100 (Sigma-Aldrich), 0.5% bovine serum albumin



Deffieu et al.

The eRUSH system uncovered Rab7 vesicles as secretory carriers

590 (Euromedex). Cells were subsequently incubated one hour at room temperature with  
591 different primary antibodies (antibodies section), then one hour with secondary  
592 antibodies and DAPI staining. Cells were mounted with mowiol 4-88 (Sigma Aldrich).  
593 For LC3 staining, cells were fixed with formalin (Sigma-Aldrich) for 15 min at RT then  
594 with cold methanol for 5 min at -20°C, prior antibody staining in PBS containing 0.1%  
595 saponin and 1% FBS.

596 Images were taken with an AxioObserver Z1 inverted microscope (Zeiss) mounted  
597 with a CSU-X1 spinning disc head (Yokogawa), a back-illuminated EMCCD camera  
598 (Evolve, Photometrics) and a X63 (1.45 NA) or X100 (1.45 NA) oil objectives (Zeiss).

### 599 ***Live imaging***

600 About 250,000 cells seeded on 35 mm #1.5 glass bottom dishes (Ibidi) or on 25 mm  
601 cover glasses (Electron Microscopy Sciences) were transfected using JetPrime  
602 (Polyplus Transfection) according to manufacturer's instructions. The dish was  
603 placed on the microscope stage, maintained in a dark atmosphere-controlled  
604 chamber at 37°C and 5% CO<sub>2</sub>. Live cell imaging was performed using an  
605 AxioObserver Z1 inverted microscope (Zeiss) mounted with a CSU-X1 spinning disc  
606 head (Yokogawa), a back-illuminated EMCCD camera (Evolve, Photometrics) and a  
607 X100, 1.45 NA oil objective (Zeiss) controlled by VisiView v.3.3.0 software (Visitron  
608 Systems). For TIRF microscopy, live imaging was performed with a TIRF PALM  
609 STORM microscope from Nikon using a back-illuminated EMCCD camera (Evolve  
610 512, Photometrics) and a X100 APO, 1.49NA oil objective controlled by Metamorph,  
611 and an iLas<sup>2</sup> FRAP/TIRF module (BioVision Technologies). The TIRF angle was  
612 chosen to obtain a calculated evanescent field depth < 100 nm.

### 613 ***Preparation of protein extracts***

Deffieu et al.

The eRUSH system uncovered Rab7 vesicles as secretory carriers

614 Cells were seeded at  $1.5 \times 10^6$  cells per 10 cm dish per conditions in complete medium  
615 containing 1  $\mu\text{g/ml}$  of avidin for 48 h. After incubation with biotin for 0 min, 30 min or  
616 24 h, cells were washed 3 times with ice cold PBS and lysed with ice cold RIPA  
617 buffer (150 mM sodium chloride, 1% NP-40, 0.5% sodium deoxycholate, 0.1%  
618 sodium dodecyl sulfate (SDS), 50 mM Tris, pH 8.0, protease inhibitor (Promega).  
619 Cells were placed on ice for 10 min and spun at 10,000 g for 20 min at 4°C. The  
620 supernatant was collected and subjected to the Pierce BCA assay kit (ThermoFisher  
621 Scientific).

### 622 **Western blot analysis**

623 A total of 40  $\mu\text{g}$  of protein lysates were run on Bolt 4-12% Bis-Tris plus gels  
624 (ThermoFisher Scientific) and proteins were transferred to nitrocellulose membranes.  
625 Nitrocellulose membranes were blocked with 5% (w/v) milk in PBS-T (PBS pH 7.4,  
626 0.05% Tween 20) for 15 min. Primary antibodies (refer to antibody section) were  
627 incubated 1 h at RT or overnight at 4°C in PBS-T containing 5% milk. Secondary  
628 antibodies were incubated 1 h at room temperature. After washing with PBS-T,  
629 nitrocellulose membranes were incubated with Clarity Max western ECL substrate  
630 (Bio-Rad). The specific proteins were visualized with the ChemiDoc imaging system  
631 (Bio-Rad).

### 632 **Software analysis**

633 Image processing was performed using either the FIJI upgrade of ImageJ (54) or the  
634 Imaris software v9.2 (Bitplane, Oxford Instruments). Quantifications for colocalization  
635 measurements were performed using Imaris software v9.2 (Bitplane, Oxford  
636 Instruments). Statistical analyses were performed with Microsoft Excel 2016 and  
637 Prism v7.04 (GraphPad). Flow cytometry analysis was done using the FlowJo  
638 software v10.4.2 (FlowJo, LLC). Raw mass spectrometry data were first analyzed

Deffieu et al.

The eRUSH system uncovered Rab7 vesicles as secretory carriers

639 using MaxQuant v 1.6.0.16. Differential proteomics data analysis was performed  
640 using DAPAR v1.10.3 and ProStaR v 1.10.4.

641

## 642 **Acknowledgements**

643 We acknowledge the imaging facility MRI, member of the national infrastructure  
644 France-Biolmaging. The mass spectrometry proteomics data have been deposited in  
645 the ProteomeXchange Consortium database (52,53) with the identifier PXD010576.

646 We thank Dr. Lucille Espert and colleagues for helpful discussions and sharing  
647 reagents related to autophagy. We thank Pr. Tom Kirchhausen for supportive  
648 discussions. This work was financially supported by the “Agence Nationale de la  
649 Recherche” (ANR) and the French Proteomic Infrastructure (ProFI; ANR-10-INBS-08-  
650 03). This work has been published within the framework of IdEx Université de  
651 Strasbourg and has received funding from the French State via the French National  
652 Research Agency (ANR) as part of the program “Investissements d’avenir” to R.G.  
653 This work was supported by an ATIP-AVENIR starting grant to R.G.

654

## 655 **Author contribution**

656 MD and RG conceived the experiments. MD, IC, CD, VL and RG generated and  
657 characterized the TfR-eRUSH cell line. IC and RG performed flow cytometry. IC  
658 conducted the siRNA-based assays. MD and RG performed the microscopy  
659 analyses. FD and AH conducted mass spectrometry an FD, SC, CC and RG  
660 analyzed the proteomics data. ES and TX generated constructs for imaging and  
661 APEX labeling. GB and FP provided technical and conceptual support. RG and MD  
662 wrote the manuscript. RG, MD, CD, FD and CC edited and commented on the  
663 manuscript.

664

Deffieu et al.

The eRUSH system uncovered Rab7 vesicles as secretory carriers

665 **Declaration of Interests**

666 The authors declare no competing interests.

667

668 **References**

- 669 1. Kelly RB. Pathways of protein secretion in eukaryotes. *Science*. 1985 Oct 4;230(4721):25–32.
- 670 2. Zhao L, Liu P, Boncompain G, Loos F, Lachkar S, Bezu L, et al. Identification of pharmacological  
671 inhibitors of conventional protein secretion. *Sci Rep*. 2018 08;8(1):14966.
- 672 3. Jensen D, Schekman R. COPII-mediated vesicle formation at a glance. *J Cell Sci*. 2011 Jan  
673 1;124(1):1–4.
- 674 4. Luini A. A brief history of the cisternal progression–maturation model. *Cell Logist*. 2011  
675 Jan;1(1):6–11.
- 676 5. Dunlop MH, Ernst AM, Schroeder LK, Toomre DK, Lavieu G, Rothman JE. Land-locked  
677 mammalian Golgi reveals cargo transport between stable cisternae. *Nat Commun [Internet]*.  
678 2017 Dec [cited 2018 Jun 17];8(1). Available from: [http://www.nature.com/articles/s41467-](http://www.nature.com/articles/s41467-017-00570-z)  
679 017-00570-z
- 680 6. Futter CE, Connolly CN, Cutler DF, Hopkins CR. Newly synthesized transferrin receptors can be  
681 detected in the endosome before they appear on the cell surface. *J Biol Chem*. 1995 May  
682 5;270(18):10999–1003.
- 683 7. Ang AL, Taguchi T, Francis S, Fölsch H, Murrells LJ, Pypaert M, et al. Recycling endosomes can  
684 serve as intermediates during transport from the Golgi to the plasma membrane of MDCK cells.  
685 *J Cell Biol*. 2004 Nov 8;167(3):531–43.
- 686 8. Lock JG, Stow JL. Rab11 in recycling endosomes regulates the sorting and basolateral transport  
687 of E-cadherin. *Mol Biol Cell*. 2005 Apr;16(4):1744–55.
- 688 9. Balch WE, McCaffery JM, Plutner H, Farquhar MG. Vesicular stomatitis virus glycoprotein is  
689 sorted and concentrated during export from the endoplasmic reticulum. *Cell*. 1994 Mar  
690 11;76(5):841–52.
- 691 10. Presley JF, Cole NB, Schroer TA, Hirschberg K, Zaal KJ, Lippincott-Schwartz J. ER-to-Golgi  
692 transport visualized in living cells. *Nature*. 1997 Sep 4;389(6646):81–5.
- 693 11. Boncompain G, Divoux S, Gareil N, de Forges H, Lescure A, Latreche L, et al. Synchronization of  
694 secretory protein traffic in populations of cells. *Nat Methods*. 2012 Mar 11;9(5):493–8.
- 695 12. Loos F, Xie W, Sica V, Bravo-San Pedro JM, Souquère S, Pierron G, et al. Artificial tethering of  
696 LC3 or p62 to organelles is not sufficient to trigger autophagy. *Cell Death Dis*. 2019  
697 Oct;10(10):771.
- 698 13. Fourriere L, Kasri A, Gareil N, Bardin S, Bousquet H, Pereira D, et al. RAB6 and microtubules  
699 restrict protein secretion to focal adhesions. *J Cell Biol*. 2019 Jul 1;218(7):2215–31.
- 700 14. Gomes-da-Silva LC, Zhao L, Bezu L, Zhou H, Sauvat A, Liu P, et al. Photodynamic therapy with  
701 redaporfin targets the endoplasmic reticulum and Golgi apparatus. *EMBO J [Internet]*. 2018 Jul  
702 2 [cited 2019 Oct 14];37(13). Available from:  
703 <https://onlinelibrary.wiley.com/doi/abs/10.15252/embj.201798354>

- 704 15. Chen Y, Gershlick DC, Park SY, Bonifacino JS. Segregation in the Golgi complex precedes export  
705 of endolysosomal proteins in distinct transport carriers. *J Cell Biol.* 2017 Dec 4;216(12):4141–  
706 51.
- 707 16. Grant BD, Donaldson JG. Pathways and mechanisms of endocytic recycling. *Nat Rev Mol Cell*  
708 *Biol.* 2009 Sep;10(9):597–608.
- 709 17. Greene CJ, Attwood K, Sharma NJ, Gross KW, Smith GJ, Xu B, et al. Transferrin receptor 1  
710 upregulation in primary tumor and downregulation in benign kidney is associated with  
711 progression and mortality in renal cell carcinoma patients. *Oncotarget* [Internet]. 2017 Dec 5  
712 [cited 2018 Jun 18];8(63). Available from: <http://www.oncotarget.com/fulltext/22323>
- 713 18. Raggi C, Gammella E, Correnti M, Buratti P, Forti E, Andersen JB, et al. Dysregulation of Iron  
714 Metabolism in Cholangiocarcinoma Stem-like Cells. *Sci Rep* [Internet]. 2017 Dec [cited 2018 Jun  
715 18];7(1). Available from: <http://www.nature.com/articles/s41598-017-17804-1>
- 716 19. Taetle R, Honeysett JM, Trowbridge I. Effects of anti-transferrin receptor antibodies on growth  
717 of normal and malignant myeloid cells. *Int J Cancer.* 1983 Sep 15;32(3):343–9.
- 718 20. Daniels TR, Bernabeu E, Rodríguez JA, Patel S, Kozman M, Chiappetta DA, et al. The transferrin  
719 receptor and the targeted delivery of therapeutic agents against cancer. *Biochim Biophys Acta.*  
720 2012 Mar;1820(3):291–317.
- 721 21. Chou Y, Cuevas C, Carocci M, Stubbs SH, Ma M, Cureton DK, et al. Identification and  
722 Characterization of a Novel Broad-Spectrum Virus Entry Inhibitor. López S, editor. *J Virol.* 2016  
723 May 1;90(9):4494–510.
- 724 22. Szklarczyk D, Franceschini A, Wyder S, Forslund K, Heller D, Huerta-Cepas J, et al. STRING v10:  
725 protein–protein interaction networks, integrated over the tree of life. *Nucleic Acids Res.* 2015  
726 Jan 28;43(D1):D447–52.
- 727 23. Subramanian A, Tamayo P, Mootha VK, Mukherjee S, Ebert BL, Gillette MA, et al. Gene set  
728 enrichment analysis: a knowledge-based approach for interpreting genome-wide expression  
729 profiles. *Proc Natl Acad Sci U S A.* 2005 Oct 25;102(43):15545–50.
- 730 24. Bonnon C, Wendeler MW, Paccaud J-P, Hauri H-P. Selective export of human GPI-anchored  
731 proteins from the endoplasmic reticulum. *J Cell Sci.* 2010 May 15;123(10):1705–15.
- 732 25. Coulter ME, Dorobantu CM, Lodewijk GA, Delalande F, Cianferani S, Ganesh VS, et al. The  
733 ESCRT-III Protein CHMP1A Mediates Secretion of Sonic Hedgehog on a Distinctive Subtype of  
734 Extracellular Vesicles. *Cell Rep.* 2018 24;24(4):973-986.e8.
- 735 26. Rizzuto R. Close Contacts with the Endoplasmic Reticulum as Determinants of Mitochondrial  
736 Ca<sup>2+</sup> Responses. *Science.* 1998 Jun 12;280(5370):1763–6.
- 737 27. Das A, Nag S, Mason AB, Barroso MM. Endosome–mitochondria interactions are modulated by  
738 iron release from transferrin. *J Cell Biol.* 2016 Sep 26;214(7):831–45.
- 739 28. Plutner H, Cox AD, Pind S, Khosravi-Far R, Bourne JR, Schwaninger R, et al. Rab1b regulates  
740 vesicular transport between the endoplasmic reticulum and successive Golgi compartments. *J*  
741 *Cell Biol.* 1991 Oct;115(1):31–43.

Deffieu et al.

The eRUSH system uncovered Rab7 vesicles as secretory carriers

- 742 29. Dejgaard SY, Murshid A, Erman A, Kizilay O, Verbich D, Lodge R, et al. Rab18 and Rab43 have  
743 key roles in ER-Golgi trafficking. *J Cell Sci.* 2008 Aug 15;121(16):2768–81.
- 744 30. Isabella AJ, Horne-Badovinac S. Rab10-Mediated Secretion Synergizes with Tissue Movement to  
745 Build a Polarized Basement Membrane Architecture for Organ Morphogenesis. *Dev Cell.* 2016  
746 Jul;38(1):47–60.
- 747 31. Kitt KN, Hernández-Deviez D, Ballantyne SD, Spiliotis ET, Casanova JE, Wilson JM. Rab14  
748 Regulates Apical Targeting in Polarized Epithelial Cells. *Traffic.* 2008 Jul;9(7):1218–31.
- 749 32. Seto S, Tsujimura K, Koide Y. Rab GTPases Regulating Phagosome Maturation Are Differentially  
750 Recruited to Mycobacterial Phagosomes. *Traffic.* 2011 Apr;12(4):407–20.
- 751 33. Matsui T, Itoh T, Fukuda M. Small GTPase Rab12 Regulates Constitutive Degradation of  
752 Transferrin Receptor. *Traffic.* 2011 Oct;12(10):1432–43.
- 753 34. Vanlandingham PA, Ceresa BP. Rab7 Regulates Late Endocytic Trafficking Downstream of  
754 Multivesicular Body Biogenesis and Cargo Sequestration. *J Biol Chem.* 2009 May  
755 1;284(18):12110–24.
- 756 35. Cai X, Xu Y, Cheung AK, Tomlinson RC, Alcázar-Román A, Murphy L, et al. PIKfyve, a Class III PI  
757 Kinase, Is the Target of the Small Molecular IL-12/IL-23 Inhibitor Apilimod and a Player in Toll-  
758 like Receptor Signaling. *Chem Biol.* 2013 Jul;20(7):912–21.
- 759 36. Bucci C, Thomsen P, Nicoziani P, McCarthy J, van Deurs B. Rab7: A Key to Lysosome Biogenesis.  
760 Pfeffer SR, editor. *Mol Biol Cell.* 2000 Feb;11(2):467–80.
- 761 37. Chen Y, Gershlick DC, Park SY, Bonifacino JS. Segregation in the Golgi complex precedes export  
762 of endolysosomal proteins in distinct transport carriers. *J Cell Biol.* 2017 Dec 4;216(12):4141–  
763 51.
- 764 38. Grigoriev I, Splinter D, Keijzer N, Wulf PS, Demmers J, Ohtsuka T, et al. Rab6 regulates transport  
765 and targeting of exocytotic carriers. *Dev Cell.* 2007 Aug;13(2):305–14.
- 766 39. Ostrowski M, Carmo NB, Krumeich S, Fanget I, Raposo G, Savina A, et al. Rab27a and Rab27b  
767 control different steps of the exosome secretion pathway. *Nat Cell Biol.* 2010 Jan;12(1):19–30.
- 768 40. Robinson MS, Sahlender DA, Foster SD. Rapid Inactivation of Proteins by Rapamycin-Induced  
769 Rerouting to Mitochondria. *Dev Cell.* 2010 Feb 16;18(2–3):324–31.
- 770 41. Schalinske KL, Blemings KP, Steffen DW, Chen OS, Eisenstein RS. Iron regulatory protein 1 is not  
771 required for the modulation of ferritin and transferrin receptor expression by iron in a murine  
772 pro-B lymphocyte cell line. *Proc Natl Acad Sci U S A.* 1997 Sep 30;94(20):10681–6.
- 773 42. Chan RY, Seiser C, Schulman HM, Kühn LC, Ponka P. Regulation of transferrin receptor mRNA  
774 expression. Distinct regulatory features in erythroid cells. *Eur J Biochem.* 1994 Mar  
775 15;220(3):683–92.
- 776 43. Farhan H. Systems biology of the secretory pathway: What have we learned so far?: Systems  
777 biology of the secretory pathway. *Biol Cell.* 2015 Jul;107(7):205–17.
- 778 44. Shibata S, Kawanai T, Hara T, Yamamoto A, Chaya T, Tokuhara Y, et al. ARHGEF10 directs the  
779 localization of Rab8 to Rab6-positive executive vesicles. *J Cell Sci.* 2016 Oct 1;129(19):3620–34.

Deffieu et al.

The eRUSH system uncovered Rab7 vesicles as secretory carriers

- 780 45. Tsuboi T. Rab3A and Rab27A cooperatively regulate the docking step of dense-core vesicle  
781 exocytosis in PC12 cells. *J Cell Sci.* 2006 May 9;119(11):2196–203.
- 782 46. Gadila SKG, Kim K. Cargo trafficking from the trans-Golgi network towards the endosome:  
783 Golgi-to-endosome traffic. *Biol Cell.* 2016 Aug;108(8):205–18.
- 784 47. Jimenez-Orgaz A, Kvainickas A, Nägele H, Denner J, Eimer S, Dengjel J, et al. Control of RAB7  
785 activity and localization through the retromer-TBC1D5 complex enables RAB7-dependent  
786 mitophagy. *EMBO J.* 2018 Jan 17;37(2):235–54.
- 787 48. Ran FA, Hsu PD, Wright J, Agarwala V, Scott DA, Zhang F. Genome engineering using the  
788 CRISPR-Cas9 system. *Nat Protoc.* 2013 Oct 24;8(11):2281–308.
- 789 49. Cox J, Hein MY, Luber CA, Paron I, Nagaraj N, Mann M. Accurate Proteome-wide Label-free  
790 Quantification by Delayed Normalization and Maximal Peptide Ratio Extraction, Termed  
791 MaxLFQ. *Mol Cell Proteomics.* 2014 Sep;13(9):2513–26.
- 792 50. Carapito C, Burel A, Guterl P, Walter A, Varrier F, Bertile F, et al. MSDA, a proteomics software  
793 suite for in-depth Mass Spectrometry Data Analysis using grid computing. *PROTEOMICS.* 2014  
794 May;14(9):1014–9.
- 795 51. Wieczorek S, Combes F, Lazar C, Giai Gianetto Q, Gatto L, Dorffer A, et al. DAPAR & ProStaR:  
796 software to perform statistical analyses in quantitative discovery proteomics. *Bioinforma Oxf*  
797 *Engl.* 2017 01;33(1):135–6.
- 798 52. Vizcaíno JA, Deutsch EW, Wang R, Csordas A, Reisinger F, Ríos D, et al. ProteomeXchange  
799 provides globally coordinated proteomics data submission and dissemination. *Nat Biotechnol.*  
800 2014 Mar;32(3):223–6.
- 801 53. Vizcaíno JA, Csordas A, del-Toro N, Dienes JA, Griss J, Lavidas I, et al. 2016 update of the PRIDE  
802 database and its related tools. *Nucleic Acids Res.* 2016 Jan 4;44(D1):D447–456.
- 803 54. Schindelin J, Arganda-Carreras I, Frise E, Kaynig V, Longair M, Pietzsch T, et al. Fiji: an open-  
804 source platform for biological-image analysis. *Nat Methods.* 2012 Jul;9(7):676–82.
- 805
- 806



807 **Fig legends**

808 **Fig 1. Generation and characterization of TfR-eRUSH gene edited cells.**

809 (A) Scheme illustrating the insertion of the linker-SBP-EGFP coding sequence in the  
810 chromosomal region containing the stop codon (red) of the *TFRC* gene (Transferrin  
811 receptor type 1, referred to as TfR). (B) PCR amplification from genomic DNA using  
812 primers flanking the TfR stop codon region confirmed the insertion of the SBP-EGFP  
813 sequence on both alleles. (C) Flow cytometry analysis indicates the total amount of  
814 TfR expressed in wild type (WT) and TfR-eRUSH cells, 24 h post-biotin treatment.  
815 Mouse anti-TfR antibody revealed with anti-mouse Alexa Fluor 647 antibody were  
816 used to measure total TfR protein levels. The bar graph indicates the mean  
817 fluorescence intensity +/- SD of cell populations expressing TfR. At least 10,000 cells  
818 per condition were acquired from n = 6 independent experiments. (D) Live cell  
819 imaging of TfR-eRUSH cells started immediately after biotin addition highlights the  
820 rapid and dramatic redistribution of TfR over time. Sequential trafficking steps include  
821 ER (0 to 6 min) to Golgi (from 4 min) to PM (from 23 min; see blue arrowheads)  
822 transport. (E) Flow cytometry analysis representing the mean fluorescence intensity  
823 of Tf-A647 bound at the surface of TfR-eRUSH cells. Cells were treated with biotin  
824 during indicated times and cells were subsequently switched to 4°C for Tf-A647  
825 binding. Background fluorescence was measured by adding an acid wash step,  
826 which stripped out all surface bound Tf-A647 (grey bars). The bar graph shows the  
827 mean +/- SD of duplicates in which at least 5,000 cells per condition were acquired  
828 and is representative of 3 individual experiments. (F) Representative  
829 immunofluorescence images detecting the arrival of TfR-eRUSH at the PM. Images  
830 were acquired with spinning disk confocal microscope at indicated time points post-  
831 biotin addition. TfR-eRUSH at the PM was monitored with Transferrin coupled to

Deffieu et al.

The eRUSH system uncovered Rab7 vesicles as secretory carriers

832 Alexa Fluor 647 (Tf-A647; upper rows) or mouse anti-TfR antibody revealed with a  
833 donkey anti-mouse Alexa 647 antibody (TfR Ab; lower rows). The protein was  
834 detected at the plasma membrane starting from 20 min post-biotin addition. Scale bar  
835 = 10  $\mu$ m.

836 **Fig 2. Proteomics analysis of neosynthesized TfR-containing membranes.**

837 (A-C) TfR-eRUSH cells were untreated (T0) or treated with biotin during 15 min (T15)  
838 or 30 min (T30). Mechanical cell lysis was performed at 4°C and membrane-  
839 containing TfR-eRUSH were isolated by immunoprecipitation using an anti-TfR  
840 antibody. LC-MS/MS proteomics analysis was run, and temporal protein enrichment  
841 was assessed (see material and methods for details). (A) STRING analysis shows  
842 the interaction map of the proteins that were enriched at T15 compared to T0. Color-  
843 codes highlight clusters of proteins of related functions. (B) Gene ontology of the  
844 proteins enriched at least 1.5 times with a significant p value ( $< 0.05$ ) at T15  
845 compared to T0 (T0-T15) were investigated using the online GSEA online software.  
846 Relevant GO pathways and their corresponding FDR (False-discovery rate) values  
847 are reported for each differential analysis. (C) Among the 20 Rab proteins identified  
848 by LC-MS/MS (see Table S2), the fold enrichment and p values of the ones that were  
849 significantly identified at T15 compared to T0 (T0-T15) are reported. No Rab protein  
850 were significantly enriched at other differential time points. (D) Representative  
851 confocal images from a single z-stack indicate the distribution of TfR-eRUSH treated  
852 for 12 min with biotin relative to the endogenous Rab5, Rab6, Rab7, Rab18 proteins  
853 and the exogenously expressed Ruby3-Rab10. TfR-eRUSH co-distributed with Rab7  
854 and Ruby3-Rab10 (zoomed panel, white arrow). Scale bar = 10  $\mu$ m. Zoomed regions  
855 from white squares were represented with a scale bar = 1  $\mu$ m.

856 **Fig 3. Identification of Rab7 as an intermediate compartment of neosynthesized**  
857 **TfR trafficking.**

858 (A) Live cell imaging using a spinning disk confocal microscope shows localization of  
859 TfR-eRUSH in Ruby3-Rab7A transfected cells. Representative images were  
860 extracted from a single-plane and TfR-eRUSH (green) was visualized within Ruby3-  
861 Rab7A (magenta) positive vesicles (white arrows) at 7 min, 9 min and 12 min post-  
862 biotin addition, scale bar = 5  $\mu\text{m}$ . (B) TfR-eRUSH cells expressing Ruby3-Rab7A  
863 were imaged as in A after treatment with 40 nM Apillimod for 30 min to increase the  
864 size of Ruby3-Rab7A vesicles. Biotin was added to release TfR-eRUSH and  
865 representative images performed with the spinning disk microscope were extracted  
866 as a single-plane at 42- and 44-min post-biotin addition. TfR-eRUSH (green)  
867 localizes at the limiting membrane of Ruby3-Rab7A vesicles (magenta) (white  
868 square, scale bar = 10  $\mu\text{m}$ ). The zoomed regions from the white square highlight  
869 single and merge staining of the Ruby3-Rab7A containing TfR-eRUSH (scale bar = 1  
870  $\mu\text{m}$ ). The white arrows indicate the repartition of TfR-eRUSH at the limiting  
871 membrane of the Ruby3-Rab7A vesicle. Of note, trafficking kinetics were much  
872 longer following Apilimod treatment. (C-D) TfR-eRUSH cell were treated 15 min with  
873 biotin, fixed and stained for endogenous Rab5, Rab6 or Rab7 using specific rabbit  
874 antibodies revealed by a donkey anti rabbit Alexa Fluor 647 antibody. (C)  
875 Representative images from a single z-stack indicate the localization of TfR-eRUSH  
876 relative to the endogenous Rab5, Rab6, Rab7 using spinning disk microscope. TfR-  
877 eRUSH colocalization with Rab6, Rab7 is represented with yellow arrows. Scale bar  
878 = 5  $\mu\text{m}$ . (D) The graph represents the quantification of the volume of TfR-eRUSH (+/-  
879 SEM) colocalizing with Rab5, Rab6 or Rab7. Data represents n = 30 cells (Rab5), n =  
880 31 cells (Rab6), n = 27 cells (Rab7) per condition from 3 independent experiments

Deffieu et al.

The eRUSH system uncovered Rab7 vesicles as secretory carriers

881 and student t-test was run to determine significance (\* p value < 0.05 and \*\*\* p value  
882 < 0.001).

883 **Fig 4. TfR-eRUSH transiting through Rab7 vesicles, localizes at the plasma**  
884 **membrane.**

885 (A) Representative images from a single z-stack indicate TfR-eRUSH co-distributed  
886 with Lamp1 and Rab7 positive vesicles. TfR-eRUSH cells were treated with biotin for  
887 7 min, fixed and stained using a rabbit anti-Rab7 antibody and a mouse anti-Lamp1  
888 antibody revealed by a donkey anti-rabbit coupled to Alexa Fluor 568 and a donkey  
889 anti-mouse coupled to Alexa Fluor 647. The images are single-plane crops from the  
890 white square of the upper left image. The snapshots show dual- and triple staining  
891 and the merge (lower right panel). TfR-eRUSH (green) co-distributed with Rab7  
892 (magenta) and Lamp1 (cyan) in perinuclear localized structures (white arrowheads).  
893 Some Rab7 positive vesicles contain TfR-eRUSH but no Lamp1 (yellow arrows). (B)  
894 Live cell imaging indicates that Rab7A positive vesicles containing TfR-eRUSH are  
895 not labeled by lysotracker. Cells were transfected with Ruby3-Rab7A for 24h. Before  
896 imaging, cells were incubated for 30 min with lysotracker (50 nM) then biotin was  
897 added to induce the release of TfR-eRUSH. Images extracted at 10 min post-biotin  
898 addition, were acquired with spinning disk confocal microscopy and represented as a  
899 single plane (scale bar = 10  $\mu$ m). White squares showed the zoomed panels with  
900 single staining and the merge. The white arrow indicates that Ruby3-Rab7A  
901 (magenta) co-distribute with TfR-eRUSH (green) while the yellow arrow shows that  
902 lysotracker (cyan) co-distribute with Ruby3-Rab7A (magenta). Scale bar= 2  $\mu$ m. (C)  
903 Immunofluorescence images indicate that Rab7A vesicles containing TfR-eRUSH  
904 does not contain DQ-BSA. TfR-eRUSH cells were incubated with 10  $\mu$ g/ml of DQ-  
905 BSA for 6 h in the presence of 1  $\mu$ g/ml avidin. Then, TfR-eRUSH cells were treated

Deffieu et al.

The eRUSH system uncovered Rab7 vesicles as secretory carriers

906 with biotin for 16 min, fixed and stained with rabbit anti-Rab7 antibody. Secondary  
907 antibody donkey anti rabbit Alexa Fluor 647 was used. Images were acquired with  
908 spinning disk confocal microscopy and are represented as a single plane (scale bar =  
909 10  $\mu$ m). White squares indicated zoomed regions with single staining and the merge.  
910 TfR-eRUSH (green) co-distributed with Rab7 (cyan) (square 1) and DQ-BSA  
911 (magenta) co-distributed with Rab7 (cyan) (square 2). Scale bar = 2  $\mu$ m. (D) The bar  
912 graph represents the quantification of the TfR-eRUSH vesicles colocalizing with  
913 Rab7A or DQ-BSA. Data represents n = 32 cells (DQ-BSA) and n = 28 cells (Rab7)  
914 from 3 independent experiments (+/- SEM). Student t-test was run to determine  
915 significance (\*\*\*) p value < 0.001). (E) Western blot analysis indicate that TfR-eRUSH  
916 is not degraded following biotin addition. TfR-eRUSH cells were incubated for 4 h in  
917 the presence or absence of 50  $\mu$ g/ml cycloheximide and 100 nM bafilomycin A1 as  
918 indicated. Biotin was added for 0 or 30 min and cells were lysed for western blot  
919 analysis. Actin was used as a loading control. The presence of LC3-II over LC3-I  
920 confirmed the inhibitory effect of bafilomycin A1 on protein degradation. Low  
921 molecular weight protein marker (LMW) was used for molecular weight estimation.  
922 (F) Immunofluorescence images indicates that LC3 does not colocalize with Rab7  
923 and TfR-eRUSH. Cells were treated with biotin for 15 min, fixed and stained with  
924 rabbit anti-Rab7 antibody, and mouse anti-LC3 antibody. Secondary antibody donkey  
925 anti rabbit Alexa Fluor 647 and donkey anti-mouse Alexa 561 were used. Images  
926 were acquired with spinning disk confocal microscopy and are represented as a  
927 single plane (scale bar = 10  $\mu$ m). White squares indicated zoomed regions with  
928 single staining and the merge. TfR-eRUSH (green) co-distributed with Rab7  
929 (magenta) but not with LC3 (cyan) Scale bar = 2  $\mu$ m.

930

931 **Figure 5. Rab7A is involved in transport of TfR-eRUSH at the plasma**  
932 **membrane.**

933 (A) TfR-eRUSH cells were treated with siRNA sequences targeting 12 different Rab  
934 mRNAs and a non-targeting siRNA control. After 48 h post-transfection, cells were  
935 untreated (T0) or treated with biotin for 15 min (T15). Measure of the amount of TfR-  
936 eRUSH at the PM was performed by flow cytometry as in Fig 1E. The bar graph  
937 represents the mean fold change +/- SD corresponding to the ratio between the Tf-  
938 A647 MFI measured at 15 min and 0 min from two individual experiments performed  
939 in duplicates in which at least 2,000 cells were analyzed. Anova and Student t-test  
940 were run to assess for significance (red bar graph: p value < 0.05 for siRab2A,  
941 siRab6A and siRab7A and p value < 0.001 for siRab27A). (B) TfR-eRUSH cells  
942 transfected with Ruby3-Rab7A were imaged by TIRF microscopy 24 h post-  
943 transfection. Cells were imaged from 5- to 25-min post-biotin addition. A  
944 representative image extracted from the Movie S4 was shown at 726 s (scale bar =  
945 10  $\mu$ m). The white square indicates the cropped region represented in the right  
946 panels. In these panels, a Ruby3-Rab7A (magenta) vesicle carrying TfR-eRUSH  
947 (green) was tracked from 704 s to 736 s. Scale bar = 1  $\mu$ m. (C) TfR-eRUSH cells  
948 transfected with Ruby3-Rab6A were imaged by TIRF microscopy 24 h post-  
949 transfection. Cells were imaged from 5- to 25-min post-biotin addition. A  
950 representative image extracted from movie S5 was shown at 860 s (scale bar = 10  
951  $\mu$ m). The white square indicates the cropped region represented in the right panels.  
952 In the right panels a Ruby3-Rab6A (magenta) vesicle carrying TfR-eRUSH (green)  
953 was tracked from 848 s to 868 s. It indicates a Rab6A vesicle releasing a TfR-eRUSH  
954 directly to the PM. Scale bar = 1  $\mu$ m.

956 **Supporting information**

957 **Fig. S1. Characterization and distribution of TfR-eRUSH over time post-biotin**  
958 **addition.**

959 (A-B) The western blot represents TfR expression in edited cells (TfR-eRUSH)  
960 compared to non-edited cells (wild type). Two molecular weight markers were used  
961 LMW (low molecular weight) and HMW (high molecular weight) to confirm TfR  
962 molecular size. Actin was used as a loading control. Anti-TfR was used in (A) and  
963 Anti-GFP in (B). (C) TfR-eRUSH cells were incubated for indicated times with biotin,  
964 fixed and stained with anti-calnexin antibodies (ER marker), anti-GM130 (cis-Golgi  
965 marker), anti-TGN46 (TGN marker) and revealed with appropriate secondary  
966 antibodies. The snapshots of cropped merged images from a single plane show TfR-  
967 eRUSH (green), Dapi staining (blue) and the indicated organelle marker (magenta).  
968 (D) Quantification of TfR-eRUSH colocalization with calnexin, GM130 or TGN46 at  
969 indicated times post-biotin addition. The Pearson's correlation coefficient in the total  
970 volume of the cell was measured using the Imaris software. The graph shows mean  
971 Pearson's correlation coefficient +/- SD and n = 17-20 cells from 2 independent  
972 experiments. Statistics were measured using unpaired t-test. \* p value < 0.05, \*\* p  
973 value < 0.01, \*\*\* p value < 0.001. ns = non-significant.

974 **Fig. S2. TfR-eRUSH co-distributes with TMED10 but does not transit through**  
975 **mitochondria.**

976 (A) Representative images from a single z-stack indicate the localization of TfR-  
977 eRUSH relative to the endogenous TMED10 protein. TfR-eRUSH cells were treated  
978 for 12 min with biotin and images were acquired with a spinning disk confocal  
979 microscope. Representative images from a single plane show TfR-eRUSH (green),

Deffieu et al.

The eRUSH system uncovered Rab7 vesicles as secretory carriers

980 TMED10 (magenta) and nucleus (blue). Scale bar = 10  $\mu$ m. Zoomed regions from  
981 white squares indicate a vesicle with TfR-eRUSH co-distributing with TMED10. Scale  
982 bar = 1  $\mu$ m. (B) TfR-eRUSH cells were incubated for indicated times with biotin and  
983 mitochondria were visualized with 100 nM Mitotracker. Representative images from a  
984 single plane show TfR-eRUSH (green), mitochondria (magenta) and nucleus (blue).  
985 White dashed squares represent zoomed regions (lower panel). (C) Live imaging of  
986 TfR-eRUSH cells incubated with MitoTracker and biotin was performed at 30 s per  
987 frame using a spinning disk confocal microscope. An isolated event of TfR-  
988 mitochondria colocalization was observed 6 min post-biotin addition, although our  
989 spatial resolution limits the extend of this observation. The red square represented  
990 zoomed regions (left panel).

991 **Fig. S3. Rab7A vesicles transporting TfR-eRUSH does not contain Rab6A.**

992 (A) TfR-eRUSH cells transfected with Ruby3-Rab6A were imaged by TIRF  
993 microscopy 24 h post-transfection. Representative images were extracted at 10, 12  
994 and 13 min post-biotin addition (scale bar = 10  $\mu$ m). The white arrows show the  
995 Ruby3-Rab6A vesicles co-distributing with TfR-eRUSH. The yellow arrows indicate  
996 the zoomed regions of a Ruby3-Rab6A vesicle (magenta) co-distributing with TfR-  
997 eRUSH (green). Scale bar = 1  $\mu$ m. (B) TfR-eRUSH cells were transfected with  
998 Ruby3-Rab7A for 24 h. Biotin was added for 15 min and images were taken with the  
999 spinning disk confocal microscope. Two cells were represented as images from a  
1000 single z-stack. The staining indicates TfR-eRUSH (green), Ruby3-Rab7A (magenta),  
1001 endogenous Rab6 (cyan), and the merge. The white arrows show Rab7A vesicles  
1002 containing TfR-eRUSH but no Rab6. Scale bars = 5  $\mu$ m.

1003 **Fig. S4. TfR-eRUSH is not degraded following biotin addition.**



Deffieu et al.

The eRUSH system uncovered Rab7 vesicles as secretory carriers

1004 (A-B) Western blots representing the absence of degradation of TfR-eRUSH in  
1005 presence of cycloheximide. Wild type and TfR-eRUSH cells were treated for 4 h with  
1006 or without 50 µg/ml of cycloheximide and subsequently treated for 30 min with biotin.  
1007 Actin was used as a loading control. Anti-TfR antibodies were used for visualization  
1008 and HMW protein marker was used for molecular weight estimation in (A). Anti-GFP  
1009 antibodies were used for visualization and LMW protein marker was used for  
1010 molecular weight estimation in (B).

1011 **Fig. S5. siRNA screen carried out on TfR-eRUSH cells**

1012 Effect of Rab silencing on TfR-eRUSH expression. TfR-eRUSH cells were treated  
1013 with siRNA sequences targeting 12 different Rab mRNAs and a non-targeting siRNA  
1014 control. After 48 h post-transfection, the amount of total TfR-eRUSH at time 0 min  
1015 was monitored by flow cytometry using EGFP fluorescence intensity. Anova test was  
1016 run to assess for significance (\* p value < 0.05, \*\* p value < 0.01, \*\*\* p value <  
1017 0.001).

1018 **Table S1. Pathway enrichment analysis of proteins binding to TfR-eRUSH**  
1019 **membranes at T0-T15.**

1020 LC-MS/MS identification of the proteins associated to TfR-eRUSH membranes  
1021 enriched > 1.5-fold at T15 compared to T0 and their associated ontology pathways.

1022 **Table S2. Analysis of the Rab family members identified by mass spectrometry.**

1023 LC-MS/MS identification of the proteins from the Rab GTPase family associated to  
1024 TfR-eRUSH membranes. Fold change is shown for all detected Rabs. The red Rabs  
1025 indicate that they are significantly enriched at T15 compared to T0.

1026 **Table S3. List of the target sequences used in the siRNA screen.**

Deffieu et al.

The eRUSH system uncovered Rab7 vesicles as secretory carriers

1027 Oligonucleotides contained in the custom-made siGenome Smart pool cherry-pick  
1028 library and used for the siRNA screen.

1029 **Movie S1. Transport of neosynthesized TfR toward the PM.**

1030 TfR-eRUSH cells were incubated with biotin and imaged using 3D spinning disk  
1031 confocal microscopy. The images correspond to a z-stack spaced by 0.6  $\mu\text{m}$   
1032 acquired every 30 s for 40 min. Three-dimensional reconstruction was performed  
1033 using Imaris.

1034 **Movie S2. TfR-eRUSH trafficking is mostly independent of the mitochondrial  
1035 distribution.**

1036 TfR-eRUSH cells were incubated with biotin and MitoTracker then imaged using 3D  
1037 spinning disk confocal microscopy. The movie corresponds to a single plane from a  
1038 z-stack spaced by 0.5  $\mu\text{m}$  acquired every 10 s for 10 min. TfR-eRUSH is shown in  
1039 green and MitoTracker in magenta. Scale bar = 2  $\mu\text{m}$ .

1040 **Movie S3. A subset of neosynthesized TfR-eRUSH traffics through Rab7-  
1041 positive vesicles.**

1042 TfR-eRUSH cells were transfected with Ruby3-Rab7A for 24 h and imaged in the  
1043 presence of biotin using 3D spinning disk confocal microscopy. The movie  
1044 corresponds to a single plane from a z-stack spaced by 0.3  $\mu\text{m}$  acquired every 10 s  
1045 from 7 min to 24 min. TfR-eRUSH is shown in green and Ruby3-Rab7A in magenta.  
1046 Scale bar = 2  $\mu\text{m}$ .

1047 **Movie S4. TfR-eRUSH vesicles transiently interact with Rab7A.**

1048 TfR-eRUSH cells were transfected with Ruby3-Rab7A for 24 h and imaged in the  
1049 presence of biotin using TIRF microscopy. The movie represents a cropped vesicle

Deffieu et al.

The eRUSH system uncovered Rab7 vesicles as secretory carriers

1050 starting from 706 s to 748 s post-biotin addition. A single evanescent field is acquired  
1051 in TIRF mode every 2 s. TfR-eRUSH is shown in green and Ruby3-Rab7A in  
1052 magenta. Scale bar = 2  $\mu$ m.

1053 **Movie S5. TfR-eRUSH vesicles interact with Rab6A.**

1054 TfR-eRUSH cells were transfected with Ruby3-Rab6A for 24 h and imaged in the  
1055 presence of biotin using TIRF microscopy. The movie represents a cropped vesicle  
1056 starting from 838 s to 878 s post-biotin addition. A single evanescent field is acquired  
1057 in TIRF mode every 2 s. TfR-eRUSH is shown in green and Ruby3-Rab6A in  
1058 magenta. Scale bar = 2  $\mu$ m.

1059

A

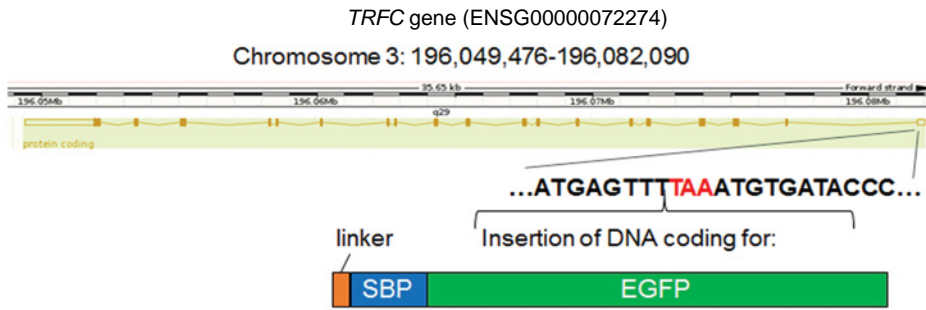

B

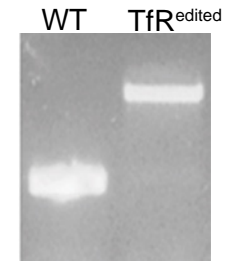

C

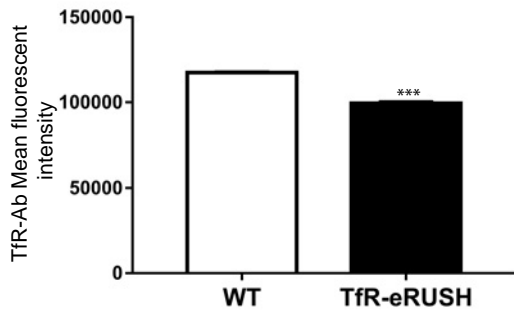

D

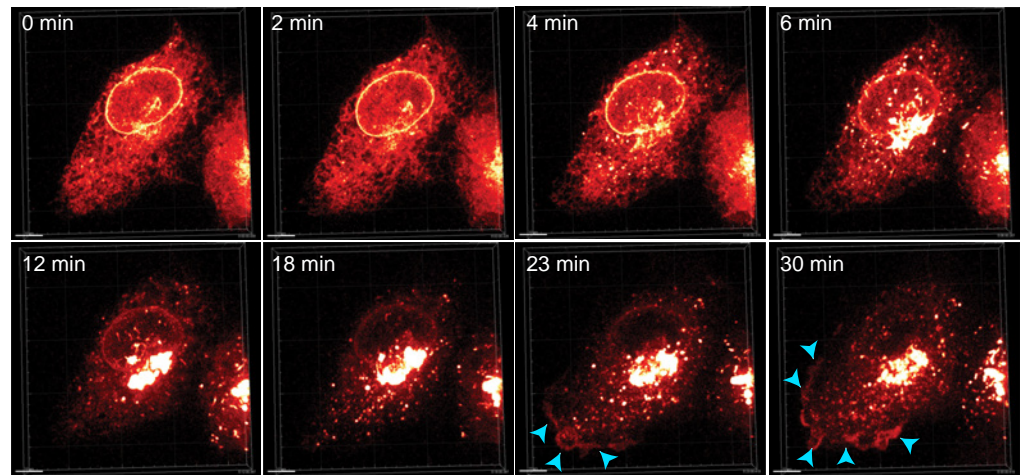

E

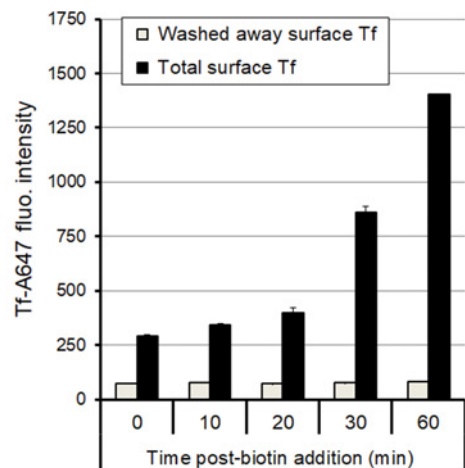

F

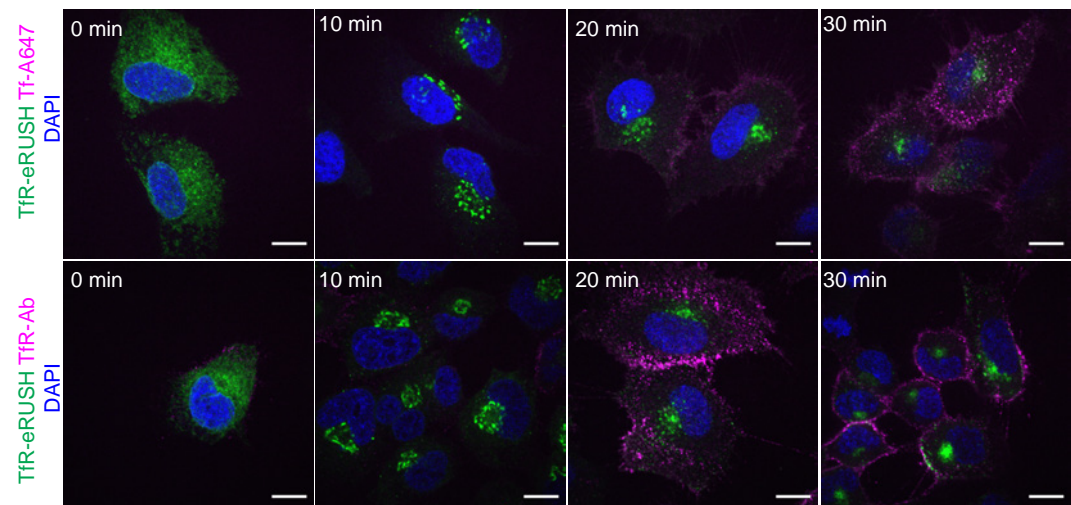

Fig 1. Deffieu et al.

A

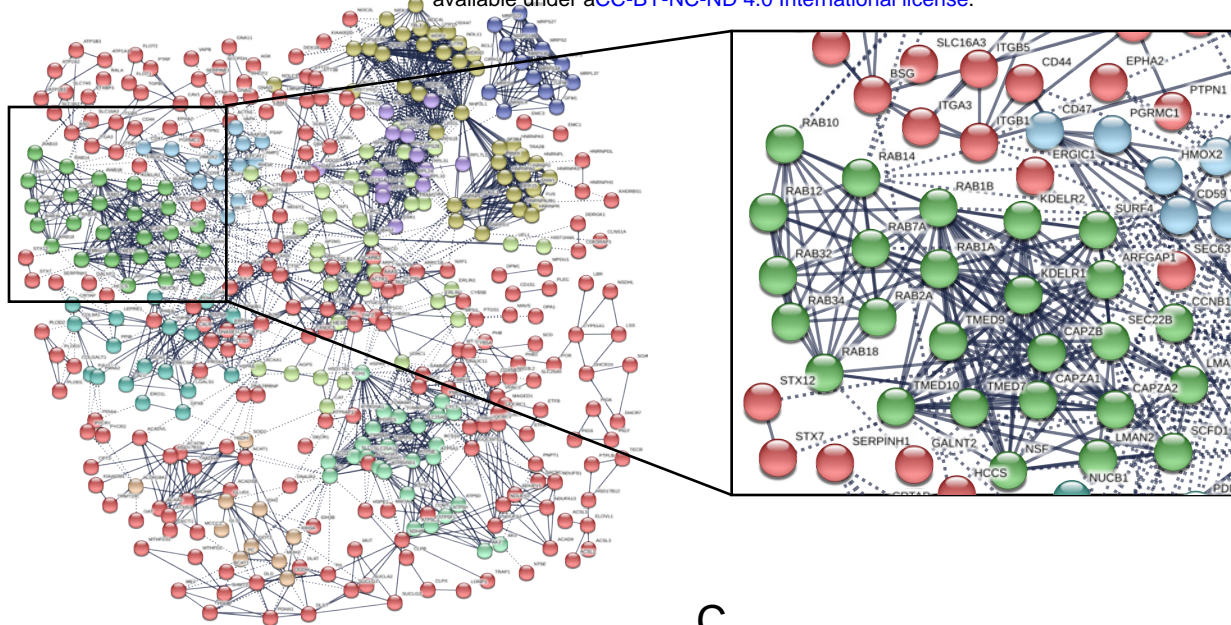

B

| Pathway (biological process)             | FDR q-value    |
|------------------------------------------|----------------|
| Oxidation reduction process              | $5.61 e^{-71}$ |
| Intracellular transport                  | $8.01 e^{-51}$ |
| Organic acid metabolic process           | $2.70 e^{-45}$ |
| Cellular macromolecule localization      | $4.77 e^{-37}$ |
| Cellular respiration                     | $1.79 e^{-36}$ |
| Intracellular protein transport          | $3.67 e^{-34}$ |
| Response to endoplasmic reticulum stress | $1.08 e^{-29}$ |
| lipid metabolic process                  | $3.61 e^{-29}$ |
| Mitochondrion organization               | $1.36 e^{-27}$ |
| Secretion                                | $3.69 e^{-26}$ |

C

| Protein     | Fold enrichment | p value |
|-------------|-----------------|---------|
| RAB18       | 1.89            | 0.0021  |
| RAB32       | 1.82            | 0.0026  |
| RAB7A       | 1.73            | 0.0080  |
| RAB10       | 1.70            | 0.0071  |
| RAB2A;RAB2B | 1.70            | 0.0102  |
| RAB1B       | 1.64            | 0.0233  |
| RAB14       | 1.61            | 0.0093  |
| RAB1A       | 1.60            | 0.0053  |
| RAB34       | 1.54            | 0.0183  |
| RAB12       | 1.52            | 0.0113  |

D

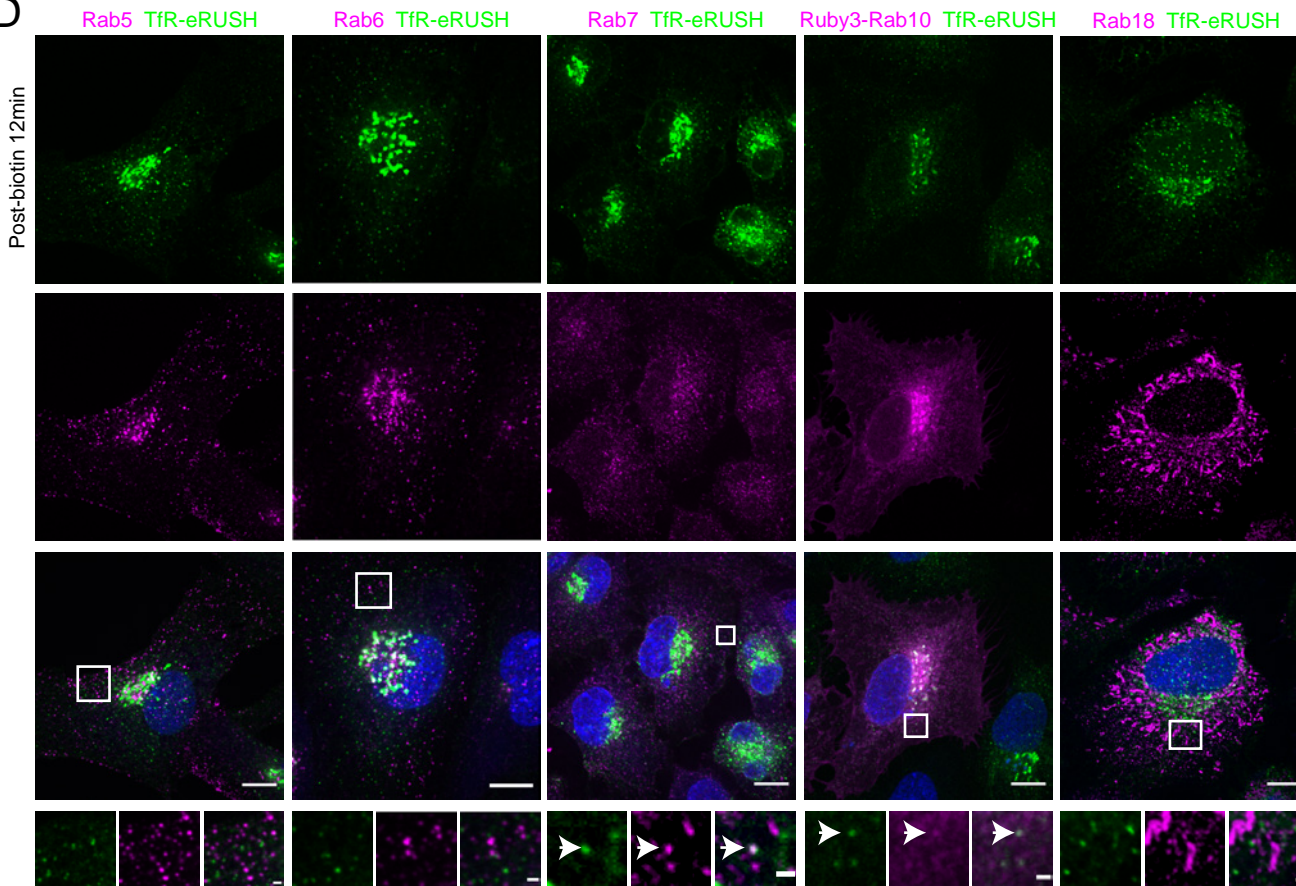

Fig 2. Deffieu et al.

A

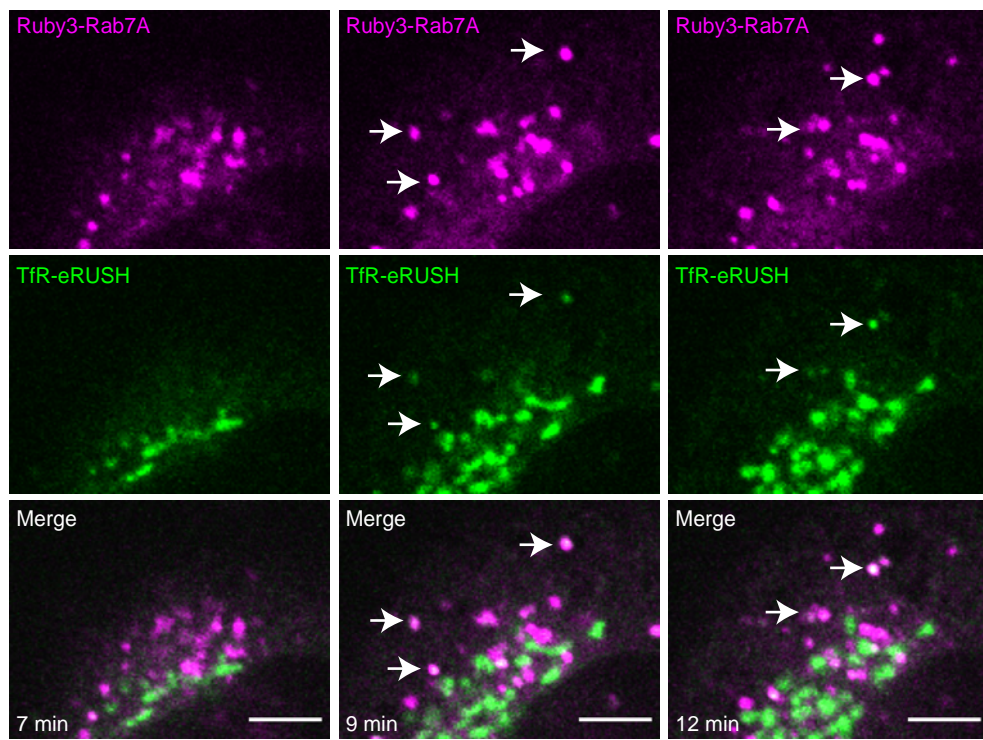

B

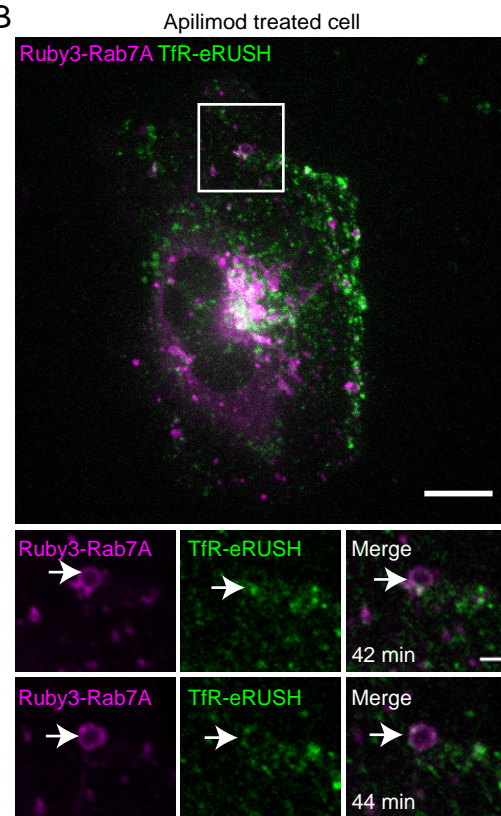

C

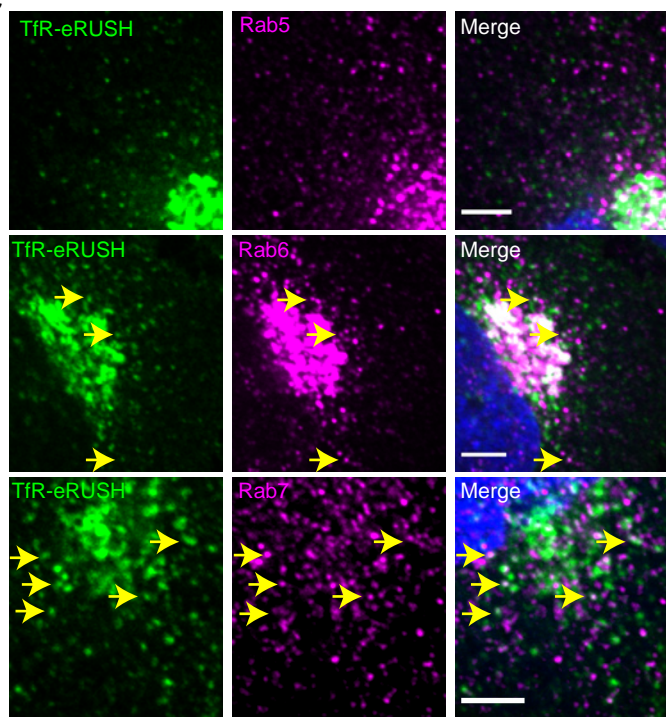

D

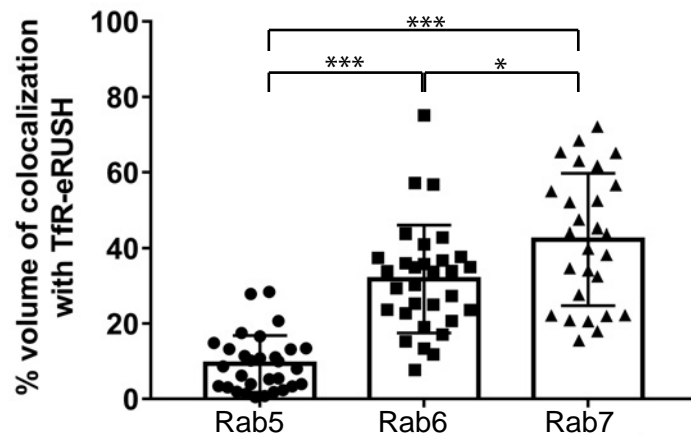

Fig 3. Deffieu et al.

A

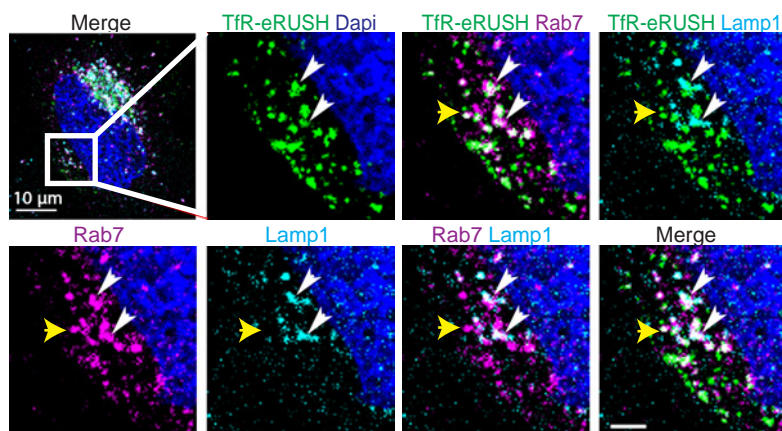

B

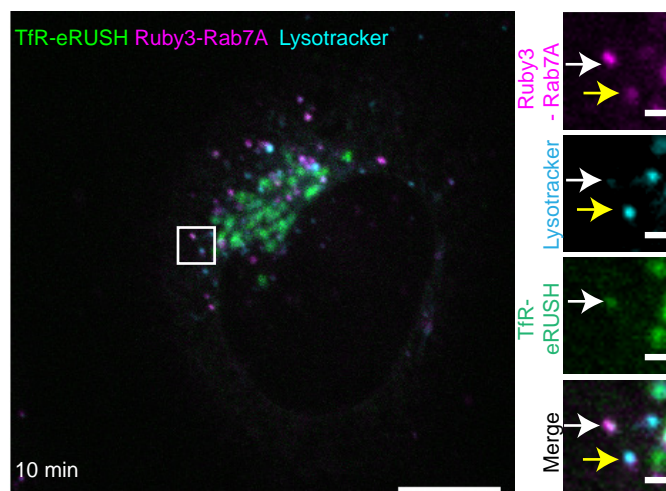

C

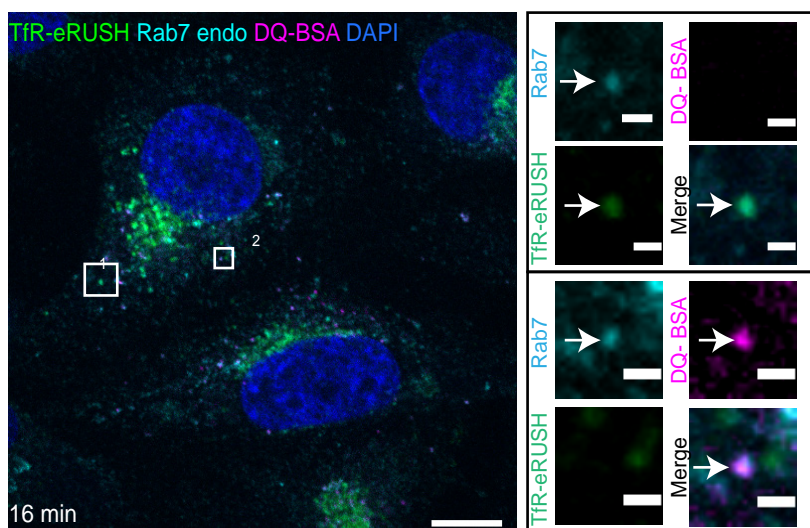

D

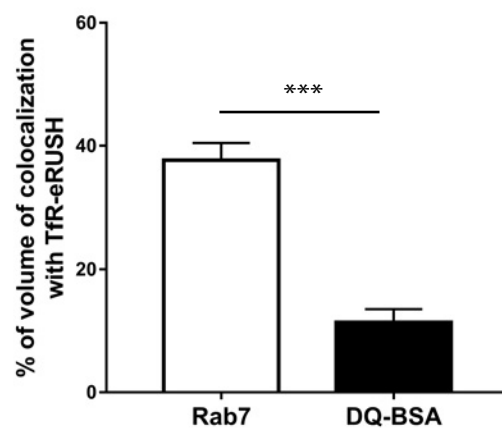

E

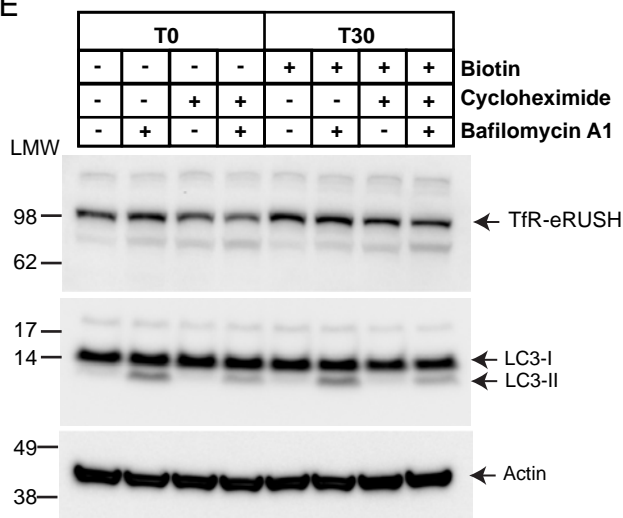

F

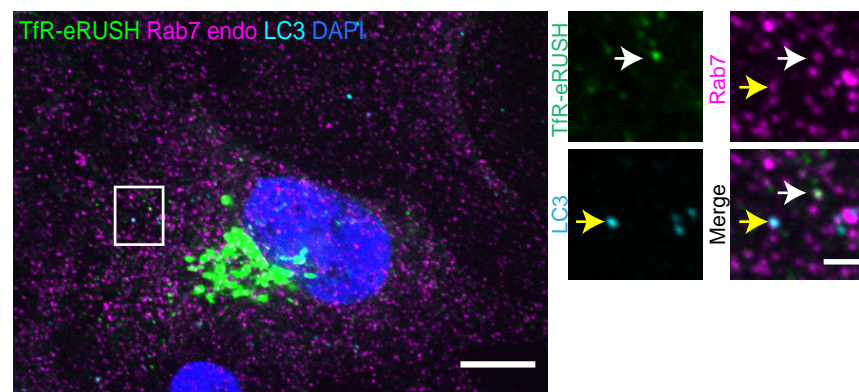

Fig 4. Deffieu et al.

A

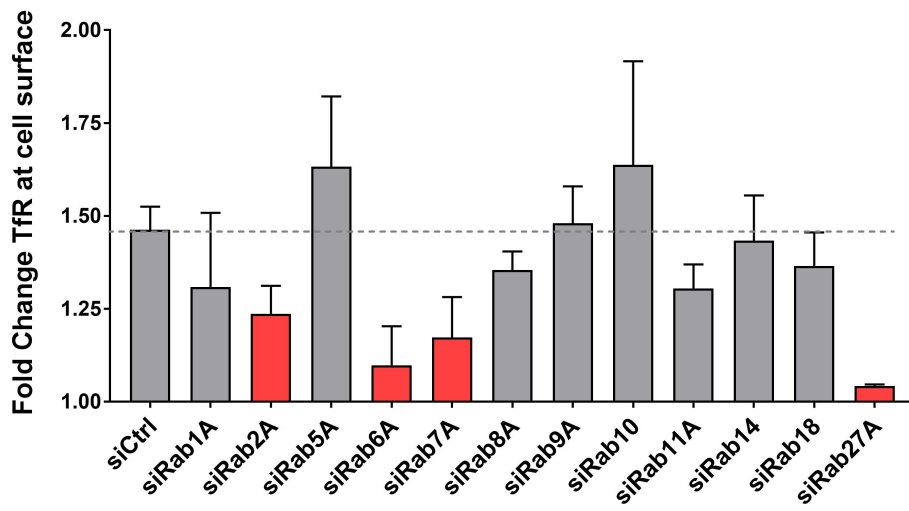

B

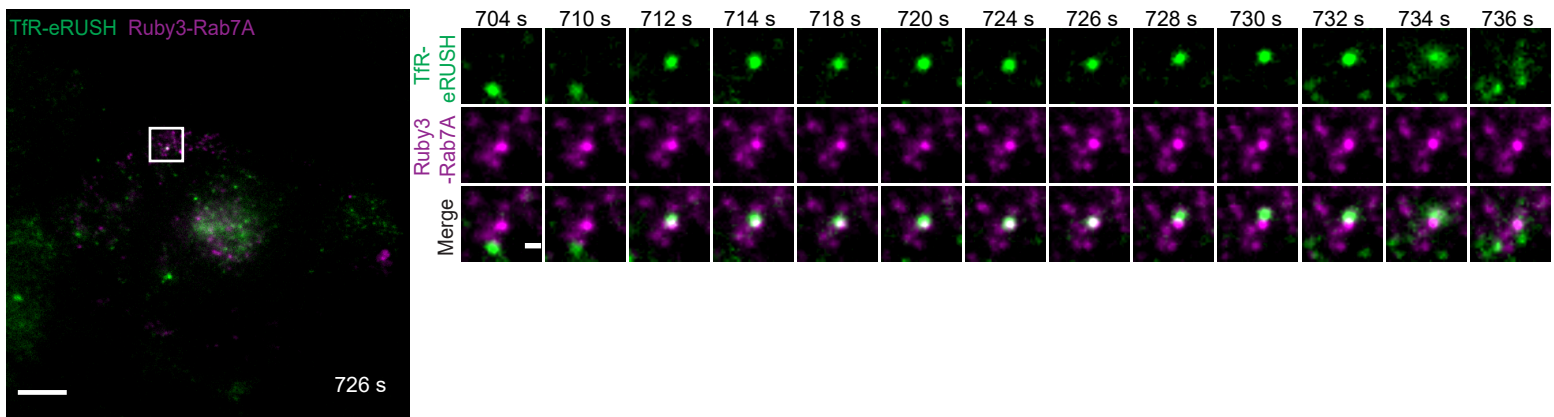

C

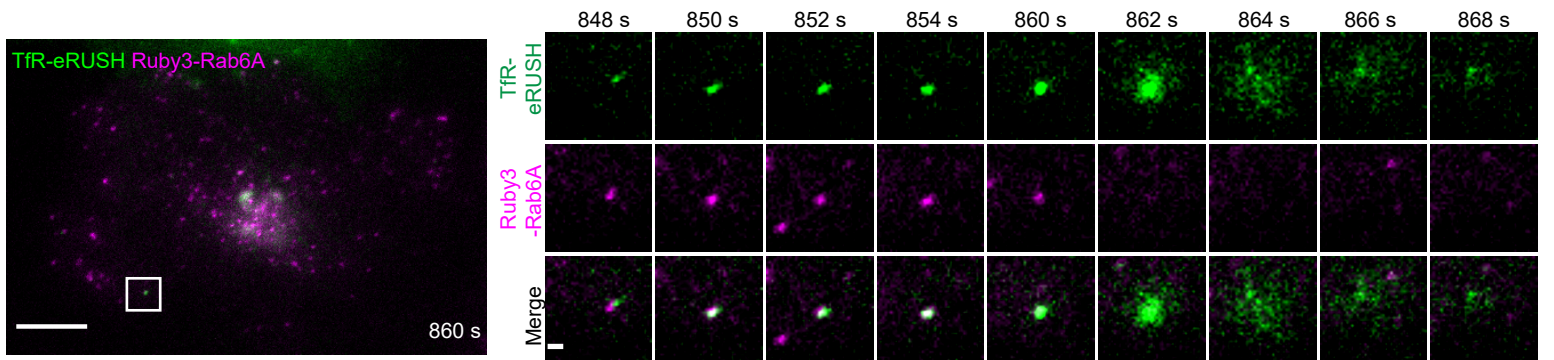

Fig 5. Deffieu et al.
